# Supplementary material for: Endohedral group-14-element clusters TM@E9(TM = Co, Ni, Cu; E = Ge, Sn, Pb) and their low-dimensional nanostructures: a first-principles study
Source: Royal Society of Chemistry journal article supplement (doi:10.1039/d1cp02915k), 2021-01-01
Supplement: d1cp02915k1.pdf [file d1cp02915k1.pdf]

## **Endohedral group-14-element clusters $TM@E_9$ (TM = Co, Ni, Cu; E = Ge, Sn, Pb) and their low-dimensional nanostructures: A first-principles study**

Xintian Zhao,<sup>a</sup> Gerui Pei,<sup>a</sup> Song Xu,<sup>a</sup> Chuncai Kong,<sup>a</sup> Zhimao Yang<sup>a</sup> and Tao Yang<sup>\*ab</sup>

<sup>a</sup> Ministry of Education Key Laboratory for Non-equilibrium Synthesis and Modulation of Condensed Matter, Shaanxi Province Key Laboratory of Advanced Functional Materials and Mesoscopic Physics, School of Physics, Xi'an Jiaotong University, Xi'an 710049, Shaanxi, China. Email: [taoyang1@xjtu.edu.cn](mailto:taoyang1@xjtu.edu.cn)

<sup>b</sup> Xi'an Jiaotong University Suzhou Academy, Suzhou 215123, Jiangsu, China

## Contents

|                                                                                                             |    |
|-------------------------------------------------------------------------------------------------------------|----|
| Test calculations on functionals.....                                                                       | 1  |
| Spin multiplicity .....                                                                                     | 2  |
| Comparison with experimental structures .....                                                               | 3  |
| Energy difference with symmetry restriction .....                                                           | 4  |
| The structural searching results.....                                                                       | 5  |
| MO correlation diagram of [Cu@Ge <sub>9</sub> ] <sup>3-</sup> and [Cu@Pb <sub>9</sub> ] <sup>3-</sup> ..... | 7  |
| The geometry of low-dimensional nanostructures .....                                                        | 8  |
| The energy curves of [Ni@E <sub>9</sub> ] nanostructures.....                                               | 9  |
| Electronic properties of low-dimensional nanostructures .....                                               | 10 |
| AIMD results .....                                                                                          | 11 |
| KDE maps of [Ni@E <sub>9</sub> ]-units .....                                                                | 12 |
| References .....                                                                                            | 14 |
| Cartesian coordinates of optimized structures .....                                                         | 15 |

To select the optimum functional, we test M062X, PBE0, B3LYP as well as X3LYP functionals for empty  $[\text{Ge}_9]^{4-}$ ,  $[\text{Sn}_9]^{4-}$ , and  $[\text{Pb}_9]^{4-}$  cluster. We divided E-E bonds of these  $[\text{E}_9]^{4-}$  structures into four groups as shown in Fig.S1, and comparing the bond distances with experiments. We found the PBE0 shows better precision and efficiency for all three clusters, as shown in Table S1. We thus selected PBE0 functional for the geometric optimized calculations.

**Table S1** The optimized results of  $[\text{Ge}_9]^{4-}$ ,  $[\text{Sn}_9]^{4-}$  and  $[\text{Pb}_9]^{4-}$  clusters by using M062X, PBE0, B3LYP, X3LYP functionals. The average E-E distances and deviations from experiments (in parentheses) are displayed. I-IV denotes different E-E bonds assigned in Fig. S1.

| d (E-E, Å)           | Exp.                | M062X         | PBE0          | B3LYP        | X3LYP        |
|----------------------|---------------------|---------------|---------------|--------------|--------------|
| $[\text{Ge}_9]^{4-}$ | Ref. <sup>[1]</sup> |               |               |              |              |
| I                    | 2.589               | 2.601 (0.5%)  | 2.584 (-0.2%) | 2.622 (1.3%) | 2.618 (1.1%) |
| II                   | 2.804               | 2.827 (0.8%)  | 2.825 (0.7%)  | 2.892 (3.1%) | 2.885 (2.9%) |
| III                  | 2.623               | 2.614 (-0.3%) | 2.597 (-1.0%) | 2.636 (0.5%) | 2.632 (0.3%) |
| IV                   | 2.537               | 2.625 (3.5%)  | 2.612 (3.0%)  | 2.652 (4.5%) | 2.652 (4.5%) |
| $[\text{Sn}_9]^{4-}$ | Ref. <sup>[2]</sup> |               |               |              |              |
| I                    | 2.954               | 2.982 (0.9%)  | 2.958 (0.1%)  | 3.004 (1.7%) | 2.999 (1.5%) |
| II                   | 3.178               | 3.227 (1.5%)  | 3.222 (1.4%)  | 3.295 (3.7%) | 3.292 (3.6%) |
| III                  | 3.012               | 3.006 (1.7%)  | 2.981 (0.8%)  | 3.026 (2.4%) | 3.022 (2.2%) |
| IV                   | 2.956               | 3.004 (-0.3%) | 2.985 (0.9%)  | 3.038 (0.9%) | 3.037 (0.8%) |
| $[\text{Pb}_9]^{4-}$ | Ref. <sup>[3]</sup> |               |               |              |              |
| I                    | 3.065               | 3.106 (1.3%)  | 3.090 (0.8%)  | 3.146 (2.6%) | 3.146 (2.6%) |
| II                   | 3.355               | 3.397 (1.3%)  | 3.377 (0.7%)  | 3.456 (3.0%) | 3.448 (2.8%) |
| III                  | 3.061               | 3.151 (2.9%)  | 3.128 (2.2%)  | 3.199 (4.5%) | 3.181 (3.9%) |
| IV                   | 3.095               | 3.143 (1.6%)  | 3.119 (0.8%)  | 3.173 (2.5%) | 3.171 (2.5%) |

The negative sign indicates bond distance value is smaller than experiments.

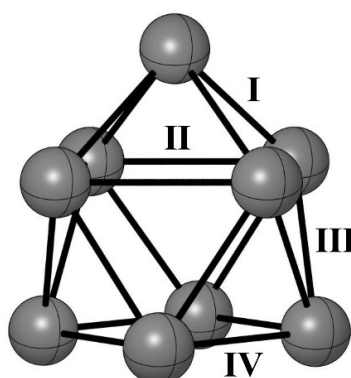

**Fig. S1.** The structure model for  $[\text{E}_9]^{4-}$  (E = Ge, Sn, Pb) clusters and the E-E bonds are divided into four groups I, II, III and IV.

To determine the spin multiplicity of  $[TM@E_9]^{n-}$  clusters, we calculated the energy difference between singlet and triplet states which termed  $\Delta E_{S-T}$  ( $\Delta E_{S-T} = E_{\text{triplet}} - E_{\text{singlet}}$ ) as shown in Table S2. The positive value demonstrated the spin multiplicity are all singlet.

**Table S2** The  $\Delta E_{S-T}$  (in eV) of  $[TM@E_9]^{n-}$  (TM = Co, Ni, Cu; E = Ge, Sn, Pb) clusters.

| Cluster | $[Co@E_9]^{5-}$ | $[Ni@E_9]^{4-}$ | $[Cu@E_9]^{3-}$ |
|---------|-----------------|-----------------|-----------------|
| E = Ge  | 0.97            | 1.43            | 1.15            |
| E = Sn  | 0.70            | 1.52            | 1.32            |
| E = Pb  | 1.36            | 1.49            | 1.25            |

**Table S3.** The theoretical and experimental geometric information of [TM@E<sub>9</sub>]<sup>n-</sup> clusters. The distance of E-E and TM-E (in Å) with average values (in parentheses) as well as the symmetry are displayed. h corresponds to the height of triangle prism (in Å). d represents the diagonal distance of square undersurface (in Å). α is bottom torsion dihedral (in degree).

| Structure                              | E-E distance        | TM-E distance       | h <sub>1</sub> | h <sub>2</sub> | h <sub>3</sub> | d <sub>2</sub> /d <sub>1</sub> | α      | Sym.                |
|----------------------------------------|---------------------|---------------------|----------------|----------------|----------------|--------------------------------|--------|---------------------|
| [Co@Ge <sub>9</sub> ] <sup>5-*</sup>   | 2.704-3.524 (2.797) | 2.351-2.365 (2.355) | 3.524          | 3.431          | 3.432          | 1.154                          | 20.216 | ca. D <sub>3h</sub> |
| [Co@Ge <sub>9</sub> ] <sup>5-[4]</sup> | 2.683-3.483 (2.801) | 2.331-2.374 (2.358) | 3.524          | 3.431          | 3.432          | 1.123                          | 18.472 | ca. D <sub>3h</sub> |
| [Co@Sn <sub>9</sub> ] <sup>5-*</sup>   | 3.003-3.775 (3.107) | 2.595-2.653 (2.615) | 3.802          | 3.753          | 3.775          | 1.203                          | 21.875 | ca. D <sub>3h</sub> |
| [Co@Sn <sub>9</sub> ] <sup>5-[5]</sup> | 2.955-3.555 (3.095) | 2.581-2.680 (2.616) | 4.220          | 3.555          | 3.441          | 1.020                          | 3.712  | ca. C <sub>4v</sub> |
| [Co@Sn <sub>9</sub> ] <sup>5-[6]</sup> | 2.927-3.626 (3.080) | 2.561-2.683 (2.603) | 4.099          | 3.626          | 3.487          | 1.077                          | 8.367  | ca. C <sub>2v</sub> |
| [Ni@Sn <sub>9</sub> ] <sup>4-*</sup>   | 2.995-3.421 (3.104) | 2.585-2.751 (2.627) | 4.286          | 3.416          | 3.421          | 1.011                          | 1.474  | ca. C <sub>4v</sub> |
| [Ni@Sn <sub>9</sub> ] <sup>4-[7]</sup> | 2.953-3.436 (3.060) | 2.521-2.738 (2.588) | 4.023          | 3.436          | 3.341          | 1.092                          | 7.392  | ca. C <sub>2v</sub> |
| [Ni@Sn <sub>9</sub> ] <sup>4-[5]</sup> | 2.951-3.942 (3.140) | 2.564-2.704 (2.622) | 3.323          | 3.905          | 3.942          | 1.443                          | 33.785 | ca. C <sub>4v</sub> |
| [Cu@Sn <sub>9</sub> ] <sup>3-*</sup>   | 3.063-3.818 (3.159) | 2.633-2.721 (2.661) | 3.908          | 3.814          | 3.818          | 1.196                          | 19.647 | ca. D <sub>3h</sub> |
| [Cu@Sn <sub>9</sub> ] <sup>3-[8]</sup> | 3.023-3.820 (3.139) | 2.610-2.700 (2.645) | 3.936          | 3.757          | 3.820          | 1.174                          | 17.981 | ca. D <sub>3h</sub> |
| [Cu@Pb <sub>9</sub> ] <sup>3-*</sup>   | 3.151-3.646 (3.267) | 2.727-2.922 (2.767) | 4.473          | 3.646          | 3.646          | 1.038                          | 4.783  | ca. C <sub>4v</sub> |
| [Cu@Pb <sub>9</sub> ] <sup>3-[8]</sup> | 3.132-3.964 (3.257) | 2.707-2.802 (2.745) | 4.094          | 3.873          | 3.964          | 1.167                          | 17.820 | ca. D <sub>3h</sub> |

\*the current theoretical work

**Table S4.** The energy difference of  $[E_9]^{4-}$  and  $[TM@E_9]^{n-}$  clusters with symmetry restriction.

| Structure        | Sym.     | Restriction | $\Delta E$ (eV) |
|------------------|----------|-------------|-----------------|
| $[Ge_9]^{4-}$    | $C_{4v}$ | $D_{3h}$    | 0.024           |
| $[Co@Ge_9]^{5-}$ | $D_{3h}$ | $C_{4v}$    | 0.031           |
| $[Ni@Ge_9]^{4-}$ | $D_{3h}$ | $C_{4v}$    | 0.022           |
| $[Cu@Ge_9]^{3-}$ | $D_{3h}$ | $C_{4v}$    | 0.017           |
| $[Sn_9]^{4-}$    | $C_{4v}$ | $D_{3h}$    | 0.042           |
| $[Co@Sn_9]^{5-}$ | $D_{3h}$ | $C_{4v}$    | 0.015           |
| $[Ni@Sn_9]^{4-}$ | $C_{4v}$ | $D_{3h}$    | 0.003           |
| $[Cu@Sn_9]^{3-}$ | $D_{3h}$ | $C_{4v}$    | 0.000           |
| $[Pb_9]^{4-}$    | $C_{4v}$ | $D_{3h}$    | 0.043           |
| $[Co@Pb_9]^{5-}$ | $C_{4v}$ | $D_{3h}$    | 0.006           |
| $[Ni@Pb_9]^{4-}$ | $C_{4v}$ | $D_{3h}$    | 0.009           |
| $[Cu@Pb_9]^{3-}$ | $C_{4v}$ | $D_{3h}$    | 0.012           |

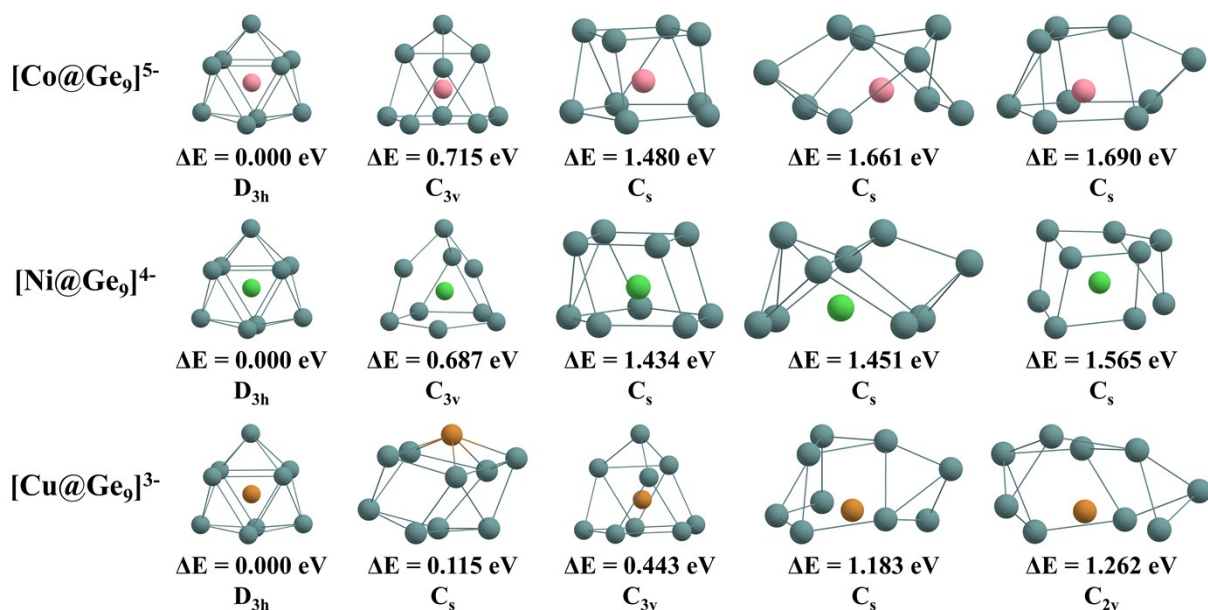

**Fig. S2** The structural searching results of  $[\text{TM}@Ge_9]^{n-}$  (TM = Co, Ni, Cu) clusters.

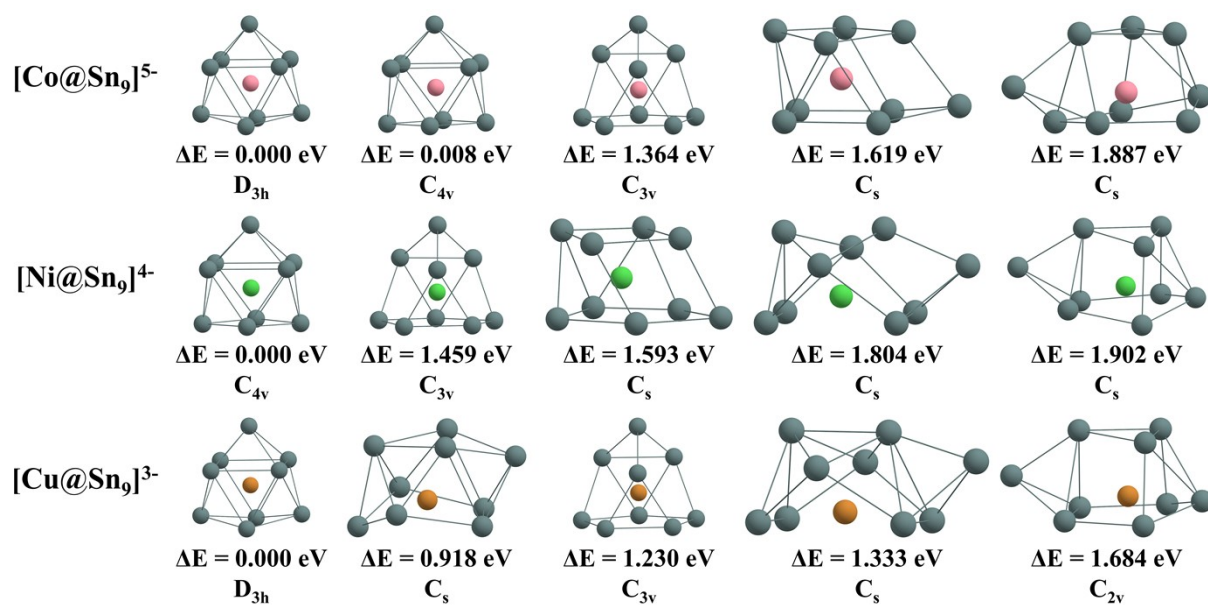

**Fig. S3** The structural searching results of  $[\text{TM}@Sn_9]^{n-}$  (TM = Co, Ni, Cu) clusters.

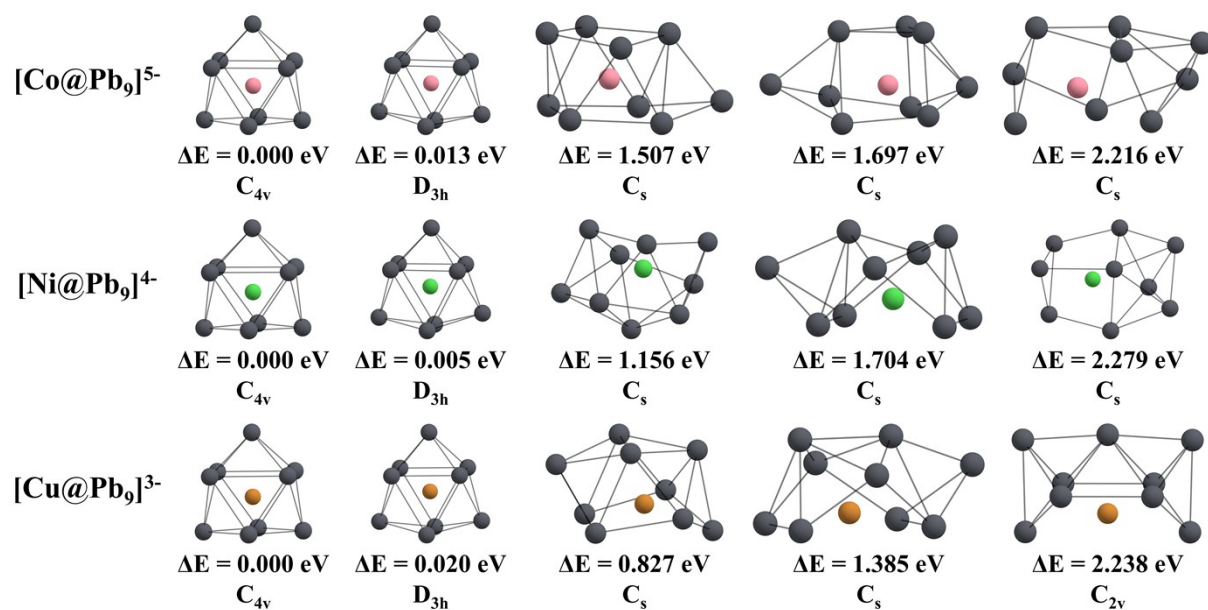

**Fig. S4** The structural searching results of  $[\text{TM}@\text{Pb}_9]^{n-}$  (TM = Co, Ni, Cu) clusters.



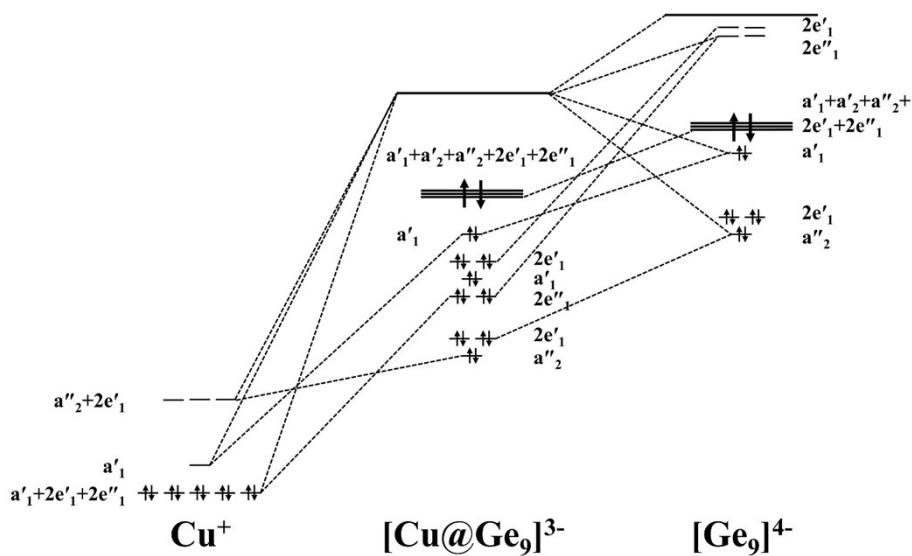

Fig. S5 The MO correlation diagram of valence orbitals of Cu with  $[\text{Ge}_9]^{4-}$  in constructing  $[\text{Cu}@\text{Ge}_9]^{3-}$  clusters.

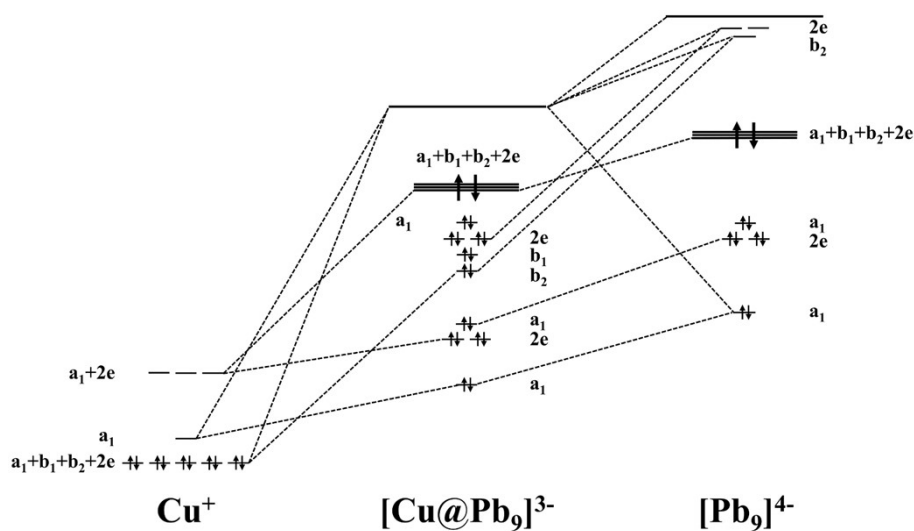

Fig. S6 The MO correlation diagram of valence orbitals of Cu with  $[\text{Pb}_9]^{4-}$  in constructing  $[\text{Cu}@\text{Pb}_9]^{3-}$  clusters.

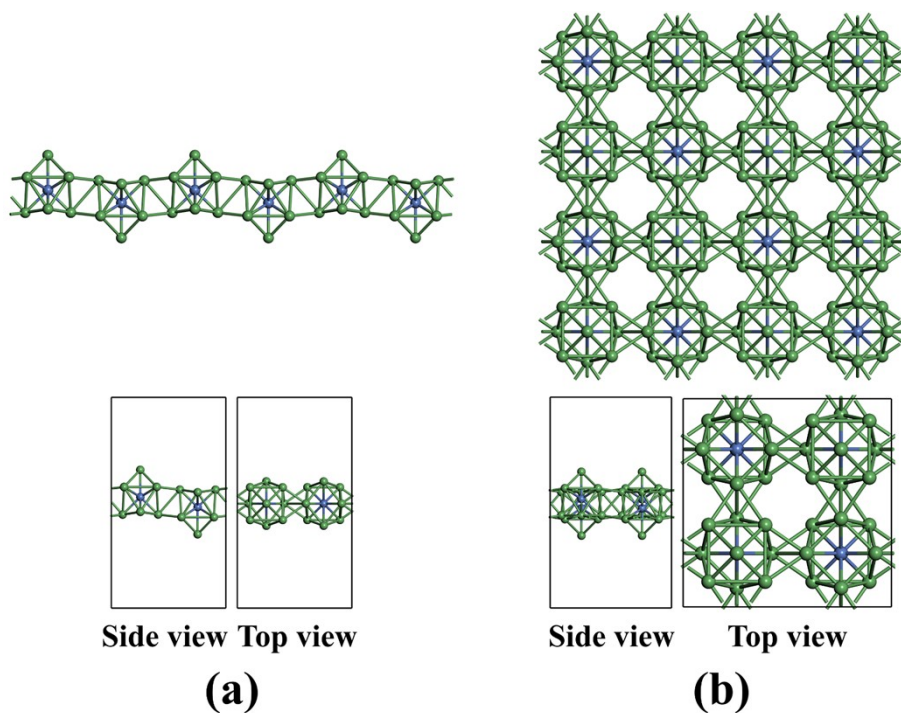

**Fig. S7** The sketch maps for [Ni@Ge<sub>9</sub>]-based (a) 1D-chain and (b) 2D-sheet nanostructures with corresponding optimized unit cell below.

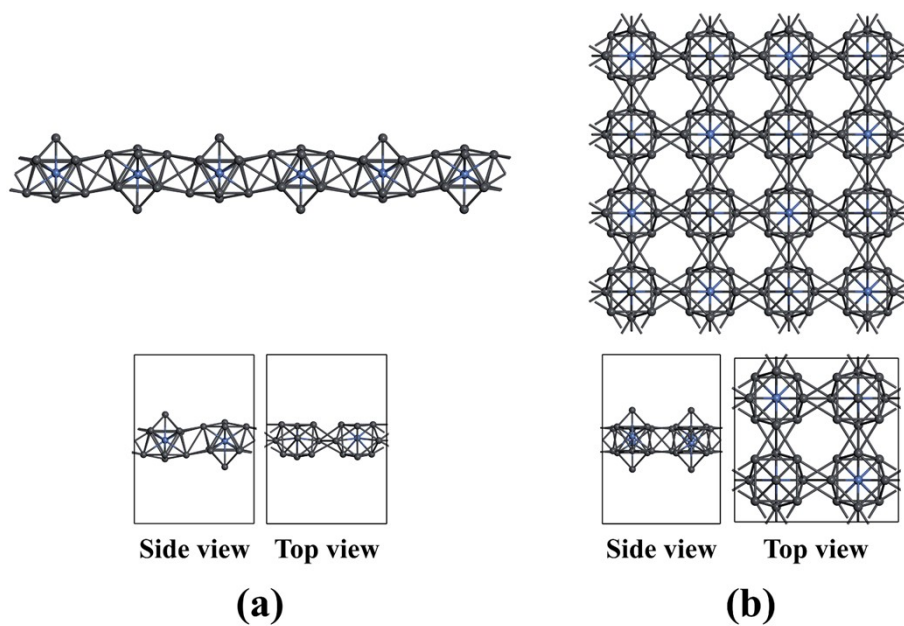

**Fig. S8** The sketch maps for [Ni@Pb<sub>9</sub>]-based (a) 1D-chain and (b) 2D-sheet nanostructures with corresponding optimized unit cell below.

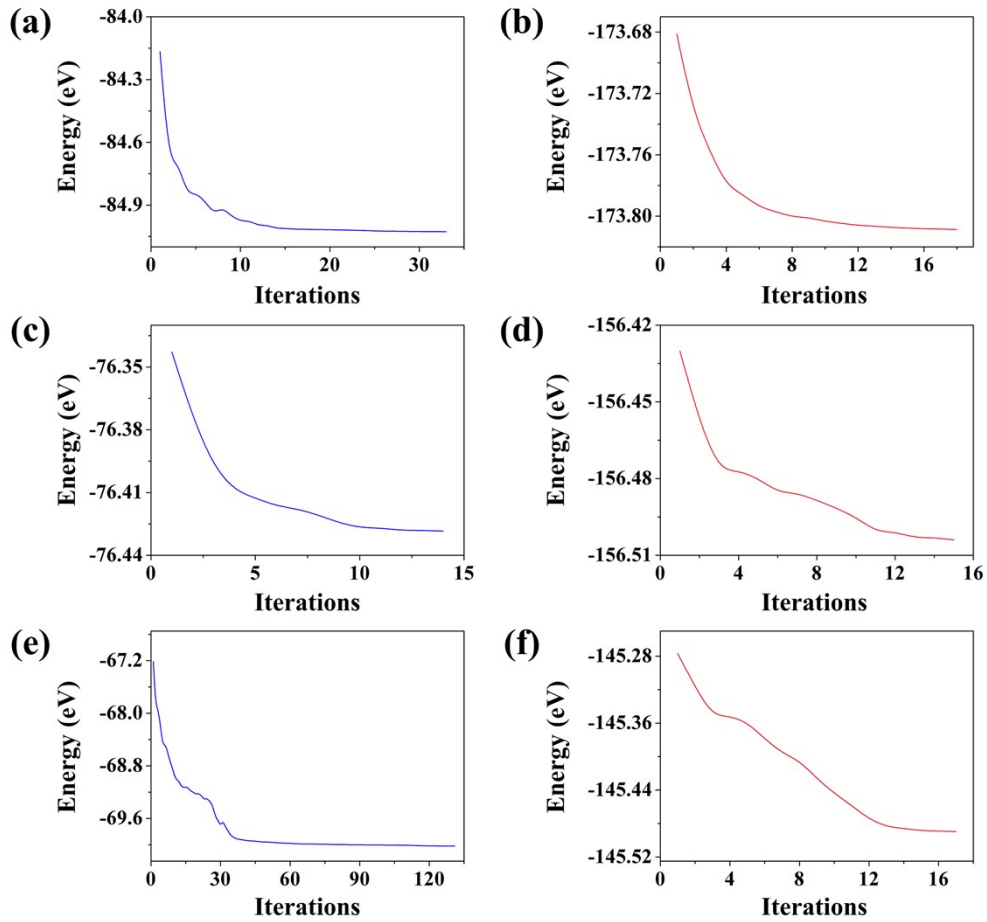

**Fig. S9** The energy curves of TM@E<sub>9</sub> (E = Ge, Sn, Pb) nanostructures during the geometry optimization. (a), (b) corresponds to Ni@Ge<sub>9</sub>-1D and Ni@Ge<sub>9</sub>-2D. (c), (d) corresponds to Ni@Sn<sub>9</sub>-1D and Ni@Sn<sub>9</sub>-2D. (e), (f) corresponds to Ni@Pb<sub>9</sub>-1D and Ni@Pb<sub>9</sub>-2D.

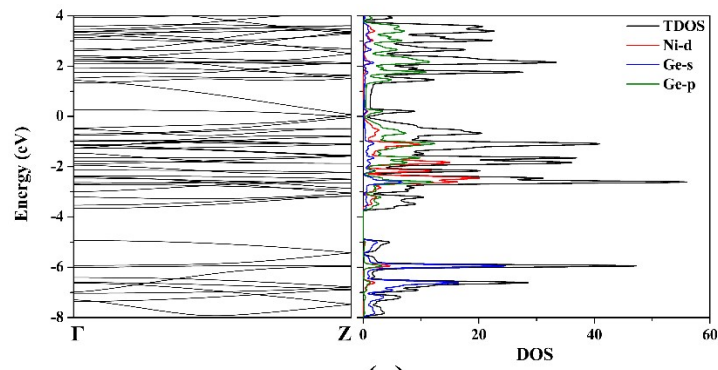

(a)

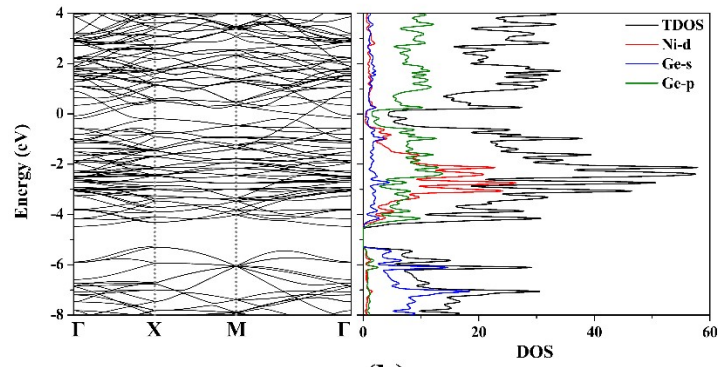

(b)

**Fig. S10** The band structure and density of states for (a)  $[\text{Ni}@\text{Ge}_9]$ -chain and (b)  $[\text{Ni}@\text{Ge}_9]$ -sheet.

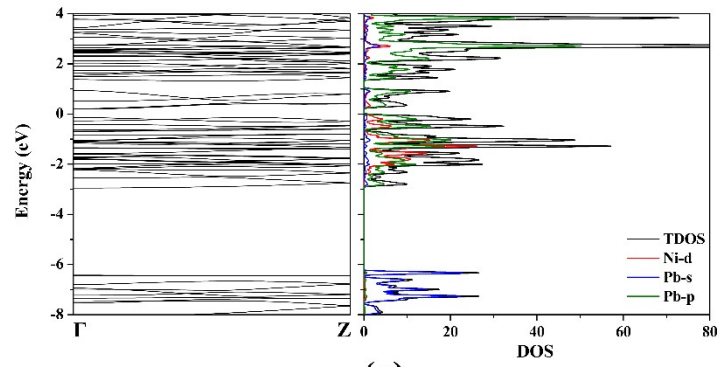

(a)

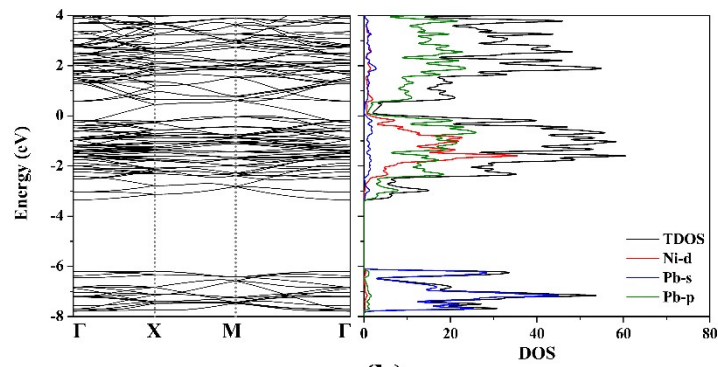

(b)

**Fig. S11** The band structure and density of states for (a)  $[\text{Ni}@\text{Pb}_9]$ -chain and (b)  $[\text{Ni}@\text{Pb}_9]$ -sheet.

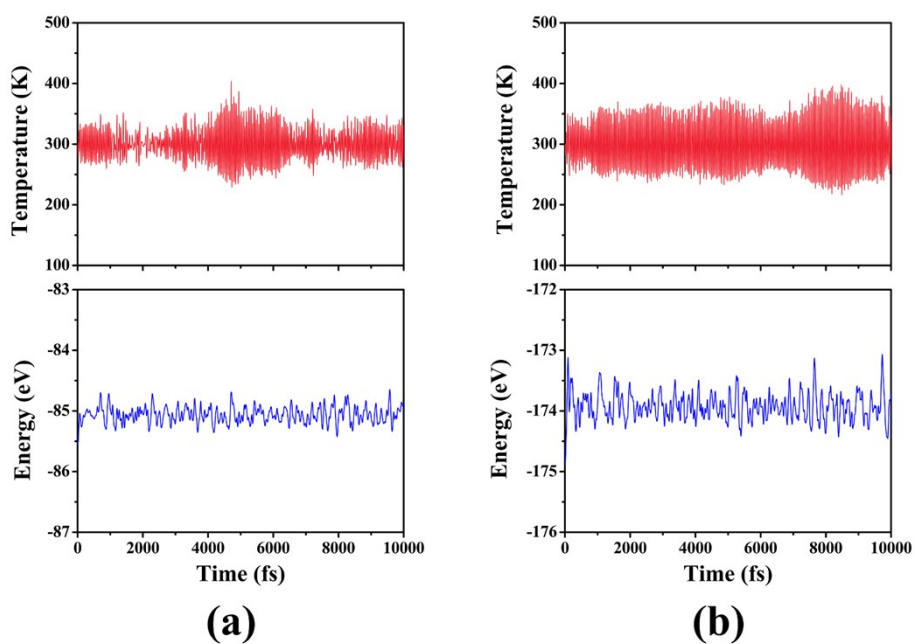

**Fig. S12** The variation of temperature and energy with simulation time for [NiGe<sub>9</sub>]-based (a) 1D-chain and (b) 2D-sheet materials.

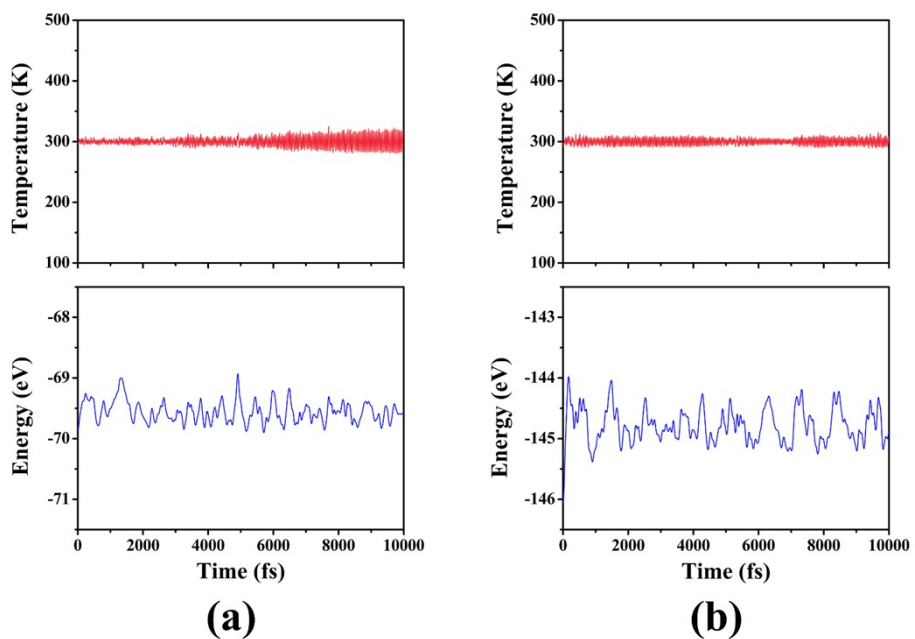

**Fig. S13** The variation of temperature and energy with simulation time for [NiPb<sub>9</sub>]-based (a) 1D-chain and (b) 2D-sheet materials.

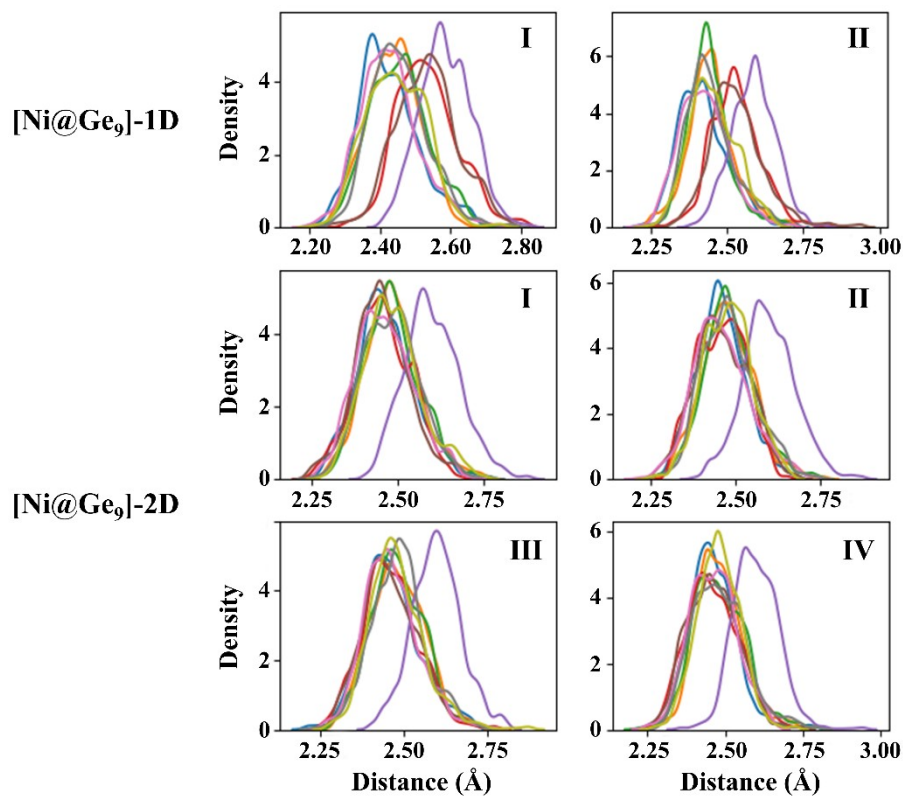

**Fig. S14** The KDE maps of TM-E bond distance of every  $[\text{Ni}@\text{Ge}_9]$  units in 1D and 2D nanostructures. I-IV are represented the different units.

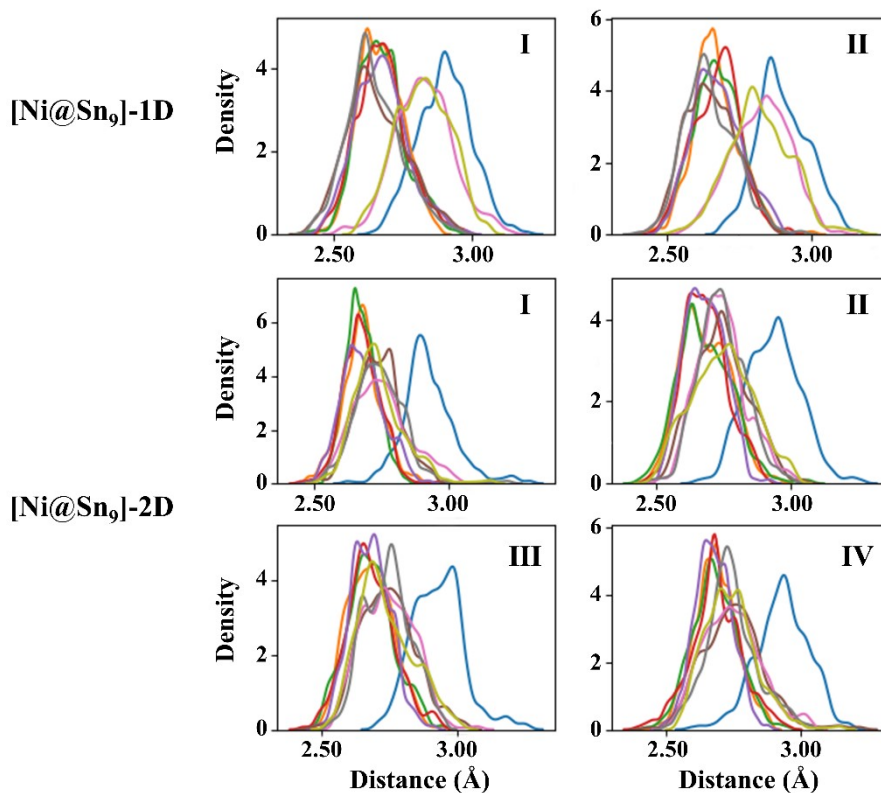

**Fig. S15** The KDE maps of TM-E bond distance of every  $[\text{Ni}@\text{Sn}_9]$  units in 1D and 2D nanostructures. I-IV are represented the different units.

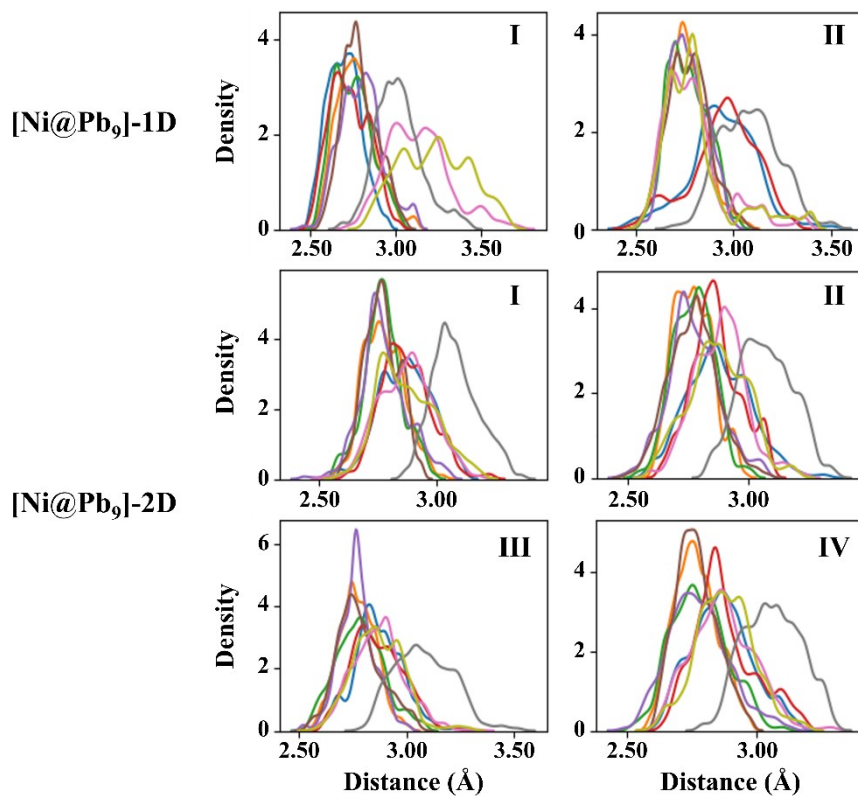

**Fig. S16** The KDE maps of TM-E bond distance of every  $[\text{Ni}@\text{Pb}_9]$  units in 1D and 2D nanostructures. I-IV are represented the different units.

## References

1. C. B. Benda, J.-Q. Wang, B. Wahl and T. F. Faessler, *Eur. J. Inorg. Chem.*, 2011, **27**, 4262-4269.
2. L. Yong, M. B. Boeddinghaus and T. F. Faessler, *Z. Anorg. Allg. Chem.*, 2010, **636**, 1293-1296.
3. L. Yong, S. D. Hoffmann and T. F. Faessler, *Eur. J. Inorg. Chem.*, 2005, **18**, 3663-3669.
4. B. J. L. Witzel, W. Klein, J. V. Duns, M. Boyko and T. F. Faessler, *Angew. Chem. Int. Ed.*, 2019, **58**, 12908-12913.
5. V. Hlukhyy, S. Stegmaier, L. van Wuelen and T. F. Faessler, *Chem. - Eur. J.*, 2014, **20**, 12157-12164.
6. V. Hlukhyy, H. He, L.-A. Jantke and T. F. Faessler, *Chem. - Eur. J.*, 2012, **18**, 12000-12007.
7. M. M. Gillett-Kunnath, J. I. Paik, S. M. Jensen, J. D. Taylor and S. C. Sevov, *Inorg. Chem.*, 2011, **50**, 11695-11701.
8. S. Scharfe, T. F. Faessler, S. Stegmaier, S. D. Hoffmann and K. Ruhland, *Chem. - Eur. J.*, 2008, **14**, 4479-4483.



## Cartesian coordinates of optimized structures

### [TM@E<sub>9</sub>]<sup>n-</sup> cluster

PBE0/def2-TZVPPD, Singlet

#### [Co@Ge<sub>9</sub>]<sup>5-</sup>

|    |             |             |             |
|----|-------------|-------------|-------------|
| Ge | 1.76283600  | -0.04328600 | -1.56439600 |
| Ge | 0.00243200  | -2.06702600 | -1.14660200 |
| Ge | 0.00221400  | 1.99946300  | -1.25973400 |
| Ge | -1.76140000 | -0.04367600 | -1.56691200 |
| Ge | -1.71632100 | -1.37092000 | 0.83242400  |
| Ge | 1.71603400  | -1.36803200 | 0.83715400  |
| Ge | -1.71548000 | 1.41561000  | 0.75598800  |
| Ge | 1.71543900  | 1.41271400  | 0.76074800  |
| Ge | -0.00535400 | 0.06538500  | 2.35709400  |
| Co | -0.00047500 | -0.00027600 | -0.00683100 |

#### [Ni@Ge<sub>9</sub>]<sup>4-</sup>

|    |             |             |             |
|----|-------------|-------------|-------------|
| Ge | 1.76389300  | 0.00027600  | 1.56781400  |
| Ge | 1.71665100  | -1.39221600 | -0.79780300 |
| Ge | 1.71541400  | 1.39155400  | -0.80080500 |
| Ge | 0.00208200  | -2.05959900 | 1.21375200  |
| Ge | -0.00427400 | -0.00338800 | -2.38657200 |
| Ge | 0.00323400  | 2.05989300  | 1.21208100  |
| Ge | -1.75963400 | 0.00243500  | 1.57160700  |
| Ge | -1.72117500 | -1.39119900 | -0.79158500 |
| Ge | -1.71634600 | 1.39262800  | -0.79480000 |
| Ni | 0.00017800  | -0.00044000 | 0.00721300  |

#### [Cu@Ge<sub>9</sub>]<sup>3-</sup>

|    |             |             |             |
|----|-------------|-------------|-------------|
| Ge | -1.85064100 | 0.00849200  | -1.54169700 |
| Ge | 0.00191900  | 2.08597300  | -1.24927900 |
| Ge | -0.00087200 | -2.07423500 | -1.26827000 |
| Ge | 1.85174800  | 0.00609400  | -1.54026400 |
| Ge | 1.71256500  | 1.41944300  | 0.81193000  |
| Ge | -1.71348600 | 1.41940900  | 0.80984300  |
| Ge | 1.71019100  | -1.42837100 | 0.79848100  |
| Ge | -1.71069800 | -1.42786800 | 0.79885200  |
| Ge | -0.00060000 | -0.00953800 | 2.41466200  |
| Cu | -0.00013900 | 0.00066300  | -0.03780100 |

#### [Co@Sn<sub>9</sub>]<sup>5-</sup>

|    |             |             |             |
|----|-------------|-------------|-------------|
| Sn | 0.01726800  | -2.58832000 | -0.57499300 |
| Sn | 1.89492100  | -1.19425600 | 1.30913400  |
| Sn | -1.89531500 | -0.55189600 | -1.68779600 |
| Sn | 1.87981600  | -0.52241000 | -1.71261500 |
| Sn | 1.89040100  | 1.74911600  | 0.36748400  |
| Sn | 0.01102700  | 0.81517000  | 2.52069200  |
| Sn | -0.02889100 | 1.79186100  | -1.94845600 |
| Sn | -1.85795900 | -1.22217700 | 1.33507400  |
| Sn | -1.91104300 | 1.72197800  | 0.39169700  |
| Co | -0.00041600 | 0.00172800  | -0.00040900 |

#### [Ni@Sn<sub>9</sub>]<sup>4-</sup>

|    |             |             |             |
|----|-------------|-------------|-------------|
| Sn | 0.01385900  | -0.00007200 | 2.69990300  |
| Sn | 1.58340400  | 1.81003900  | 0.89716500  |
| Sn | 1.83546300  | -1.55467000 | 0.89888400  |
| Sn | -1.57637600 | -1.80545100 | 0.91593900  |
| Sn | -1.82318000 | 1.55643400  | 0.91492600  |
| Sn | -0.16808000 | 2.15971100  | -1.56137800 |
| Sn | 2.12849500  | 0.15447200  | -1.59990800 |
| Sn | 0.15217700  | -2.16108000 | -1.55996200 |
| Sn | -2.14592100 | -0.15945700 | -1.57714800 |
| Ni | 0.00028400  | 0.00013000  | -0.05075300 |

#### [Cu@Sn<sub>9</sub>]<sup>3-</sup>

|    |             |             |             |
|----|-------------|-------------|-------------|
| Sn | -1.95229300 | -0.15179300 | -1.77658300 |
| Sn | -1.90891200 | 1.64268400  | 0.76157300  |
| Sn | -1.90861700 | -1.48662300 | 1.03231200  |
| Sn | 1.95521700  | -0.15508600 | -1.77318600 |
| Sn | 1.90869500  | 1.64057400  | 0.76616600  |
| Sn | 1.90581000  | -1.48763200 | 1.03583000  |
| Sn | -0.00054400 | -2.44625000 | -1.17148000 |
| Sn | -0.00314700 | 0.23384000  | 2.70244700  |
| Sn | 0.00381000  | 2.21020900  | -1.57212600 |
| Cu | -0.00003500 | 0.00013100  | -0.00854000 |

#### [Co@Pb<sub>9</sub>]<sup>5-</sup>

|    |             |             |             |
|----|-------------|-------------|-------------|
| Pb | -2.19490800 | 1.66085800  | -0.00391400 |
| Pb | -1.77814300 | -0.97094100 | -1.71501800 |
| Pb | -1.78091100 | -0.96475100 | 1.71530400  |
| Pb | 2.14450900  | 1.72479400  | -0.00165500 |

|    |             |             |             |
|----|-------------|-------------|-------------|
| Pb | 1.80787100  | -0.91900300 | -1.71289400 |
| Pb | 1.80701100  | -0.91265800 | 1.71690800  |
| Pb | -0.02433700 | 1.58805200  | 2.25861100  |
| Pb | 0.04081000  | -2.80103700 | 0.00493700  |
| Pb | -0.02174800 | 1.58304100  | -2.26219800 |
| Co | -0.00046300 | 0.03536600  | -0.00024300 |

[Ni@Pb<sub>9</sub>]<sup>4-</sup>

|    |             |             |             |
|----|-------------|-------------|-------------|
| Pb | -2.19143800 | 1.69388000  | -0.01042700 |
| Pb | -1.79693100 | -0.95359300 | -1.71496600 |
| Pb | -1.79707100 | -0.93179000 | 1.72667500  |
| Pb | 2.19074900  | 1.69469600  | -0.01077300 |
| Pb | 1.79703300  | -0.95313500 | -1.71510200 |
| Pb | 1.79772800  | -0.93132500 | 1.72623100  |
| Pb | -0.00001700 | 1.60576400  | 2.27343400  |
| Pb | 0.00033600  | -2.82075800 | 0.01774700  |
| Pb | -0.00037600 | 1.57812800  | -2.29267400 |
| Ni | -0.00003900 | 0.05310000  | -0.00042400 |

[Cu@Pb<sub>9</sub>]<sup>3-</sup>

|    |             |             |             |
|----|-------------|-------------|-------------|
| Pb | 2.23601900  | -0.00150600 | -1.70163300 |
| Pb | 1.82380700  | 1.74521400  | 0.94909400  |
| Pb | 1.82265400  | -1.74532000 | 0.95076500  |
| Pb | -2.23654700 | -0.00012600 | -1.70055200 |
| Pb | -1.82239000 | 1.74574600  | 0.95048700  |
| Pb | -1.82324000 | -1.74385600 | 0.95220600  |
| Pb | -0.00147900 | -2.32195400 | -1.60302200 |
| Pb | 0.00119500  | 0.00145100  | 2.83765300  |
| Pb | -0.00008800 | 2.32033800  | -1.60529000 |
| Cu | 0.00019800  | 0.00003700  | -0.08400400 |

The primitive cells of [Ni@E<sub>9</sub>]-based nanostructures

[Ni@Ge<sub>9</sub>]-1D-chain

|    |              |              |             |
|----|--------------|--------------|-------------|
| Ni | 9.456399918  | 10.080599785 | 8.112112045 |
| Ni | 10.408200264 | 10.080399513 | 2.678422928 |
| Ge | 11.121200562 | 10.074000359 | 9.791574478 |
| Ge | 8.495800018  | 8.527400017  | 9.651800156 |
| Ge | 8.510000229  | 11.638000488 | 9.654735565 |
| Ge | 10.843800545 | 7.971400261  | 8.108851433 |
| Ge | 6.874799728  | 10.090199471 | 8.118308067 |
| Ge | 10.862999916 | 12.178400040 | 8.110264778 |
| Ge | 11.113800049 | 10.075199127 | 6.424171925 |
| Ge | 8.489000320  | 8.535400391  | 6.566011429 |

|    |              |              |             |
|----|--------------|--------------|-------------|
| Ge | 8.504199982  | 11.632599831 | 6.563729286 |
| Ge | 8.750800133  | 10.079000473 | 4.361798286 |
| Ge | 11.367198944 | 11.632200241 | 4.221045971 |
| Ge | 11.371200562 | 8.527200699  | 4.217894077 |
| Ge | 9.004600525  | 12.176199913 | 2.675488472 |
| Ge | 12.992600441 | 10.081600189 | 2.681140423 |
| Ge | 9.009799957  | 7.981400013  | 2.675597191 |
| Ge | 8.761600494  | 10.078599930 | 0.982439876 |
| Ge | 11.371400833 | 11.627799988 | 1.129713535 |
| Ge | 11.374799728 | 8.532199860  | 1.131561279 |

[Ni@Ge<sub>9</sub>]-2D-sheet

|    |              |              |              |
|----|--------------|--------------|--------------|
| Ni | 8.717920303  | 8.714815140  | 10.546799660 |
| Ni | 2.963089943  | 8.713319778  | 9.658599854  |
| Ni | 2.966079950  | 2.961709976  | 10.543600082 |
| Ni | 8.714010239  | 2.958489895  | 9.677199364  |
| Ge | 8.714585304  | 6.795464993  | 9.000999451  |
| Ge | 7.148974895  | 7.148399830  | 11.566800117 |
| Ge | 10.277665138 | 7.147365570  | 11.573400497 |
| Ge | 6.802364826  | 8.714124680  | 8.994199753  |
| Ge | 8.713550568  | 8.709295273  | 13.134399414 |
| Ge | 10.631634712 | 8.709870338  | 8.996000290  |
| Ge | 8.717920303  | 10.629335403 | 9.001600266  |
| Ge | 7.152310371  | 10.276974678 | 11.573400497 |
| Ge | 10.281919479 | 10.276169777 | 11.575399399 |
| Ge | 2.959985018  | 10.627955437 | 11.210000992 |
| Ge | 1.397019982  | 10.276974678 | 8.635600090  |
| Ge | 4.528699875  | 10.276515007 | 8.637400627  |
| Ge | 1.050524950  | 8.709870338  | 11.213399887 |
| Ge | 2.963320017  | 8.709064484  | 7.074399948  |
| Ge | 4.878759861  | 8.717689514  | 11.212799072 |
| Ge | 2.967344999  | 6.799489975  | 11.213599205 |
| Ge | 1.400699973  | 7.144145012  | 8.642200470  |
| Ge | 4.530885220  | 7.148055077  | 8.643599510  |
| Ge | 2.965849876  | 4.875770092  | 8.991000175  |
| Ge | 4.530310154  | 4.524445057  | 11.565599442 |
| Ge | 1.402885079  | 4.526285172  | 11.571999550 |
| Ge | 4.882784843  | 2.956764936  | 8.998600006  |
| Ge | 2.967344999  | 2.962860107  | 13.133600235 |
| Ge | 1.047995090  | 2.963204861  | 9.000800133  |
| Ge | 2.961479902  | 1.046270013  | 8.993800163  |
| Ge | 4.527550220  | 1.394719958  | 11.571799278 |
| Ge | 1.400240064  | 1.399090052  | 11.573800087 |
| Ge | 8.718034744  | 1.046959996  | 11.232999802 |

|                                |              |              |              |                                |              |              |              |
|--------------------------------|--------------|--------------|--------------|--------------------------------|--------------|--------------|--------------|
| Ge                             | 10.282150269 | 1.395869970  | 8.654399872  | Sn                             | 9.942187305  | 7.710615153  | 8.831600180  |
| Ge                             | 7.149205208  | 1.392189980  | 8.656799316  | Sn                             | 3.349865442  | 9.868557931  | 6.690999980  |
| Ge                             | 10.629449844 | 2.963320017  | 11.229599953 | Sn                             | 1.621030329  | 11.594094271 | 8.525199900  |
| Ge                             | 8.710445404  | 2.956535101  | 7.090600014  | Sn                             | 5.073950296  | 11.598976138 | 8.525599480  |
| Ge                             | 6.802364826  | 2.956880093  | 11.234199524 | Sn                             | 5.078436374  | 8.143022542  | 8.523799900  |
| Ge                             | 8.713089943  | 4.874390125  | 11.230400085 | Sn                             | 1.624197124  | 8.142625802  | 8.525400160  |
| Ge                             | 10.275135040 | 4.523869991  | 8.653600693  | Sn                             | 1.191394684  | 9.865391730  | 11.302000040 |
| Ge                             | 7.150469780  | 4.523525238  | 8.657199860  | Sn                             | 3.349205735  | 12.028612139 | 11.301399240 |
| [Ni@Sn <sub>9</sub> ]-1D-chain |              |              |              | Sn                             | 5.511106967  | 9.870537752  | 11.303199760 |
| Ni                             | 10.362998960 | 10.114999780 | 9.232109070  | Sn                             | 3.354483841  | 7.707580086  | 11.301399240 |
| Ni                             | 9.401999480  | 10.112400060 | 3.069976331  | Sn                             | 3.348018167  | 3.271090032  | 13.435200700 |
| Sn                             | 13.288600920 | 10.210800180 | 9.239378932  | Sn                             | 1.622745639  | 1.547005178  | 11.600199700 |
| Sn                             | 11.330399520 | 11.853199960 | 10.948412896 | Sn                             | 5.074873920  | 1.544102313  | 11.601200100 |
| Sn                             | 11.343999860 | 11.853599540 | 7.520980364  | Sn                             | 5.075797558  | 4.997682093  | 11.604199400 |
| Sn                             | 11.479599000 | 8.426799780  | 7.548828125  | Sn                             | 1.626440282  | 5.000057216  | 11.603000640 |
| Sn                             | 11.466799740 | 8.431400300  | 10.925986295 | Sn                             | 1.185984494  | 3.277687790  | 8.830200200  |
| Sn                             | 8.562800400  | 10.060000420 | 11.094919199 | Sn                             | 3.344851253  | 1.115390306  | 8.819199560  |
| Sn                             | 8.759799960  | 12.462999340 | 9.222990987  | Sn                             | 5.510711190  | 3.272805448  | 8.828399660  |
| Sn                             | 8.577199940  | 10.055399900 | 7.355129241  | Sn                             | 3.351580857  | 5.432067865  | 8.821200380  |
| Sn                             | 8.944000240  | 7.657199860  | 9.230260849  | Sn                             | 9.946146011  | 3.272673364  | 6.726200100  |
| Sn                             | 6.479799740  | 10.200599680 | 3.062460180  | Sn                             | 11.673001289 | 1.548324698  | 8.561400420  |
| Sn                             | 8.430200580  | 11.849800100 | 1.351947909  | Sn                             | 8.219553950  | 1.548456663  | 8.563200000  |
| Sn                             | 8.417799940  | 11.848000520 | 4.783569335  | Sn                             | 8.219422341  | 4.998605730  | 8.559599880  |
| Sn                             | 8.295999520  | 8.419799800  | 4.753011221  | Sn                             | 11.670495033 | 5.002696031  | 8.560000420  |
| Sn                             | 8.308400160  | 8.422399520  | 1.379425524  | Sn                             | 12.108971593 | 3.276368138  | 11.337800020 |
| Sn                             | 11.206599240 | 10.070600500 | 1.208275681  | Sn                             | 9.949180603  | 1.114070773  | 11.339999200 |
| Sn                             | 10.996399880 | 12.470799440 | 3.076876637  | Sn                             | 7.785696026  | 3.273069378  | 11.338399880 |
| Sn                             | 11.189600000 | 10.065399160 | 4.945847038  | Sn                             | 9.945090289  | 5.434179308  | 11.336400980 |
| Sn                             | 10.839600560 | 7.666800020  | 3.071578497  | [Ni@Pb <sub>9</sub> ]-1D-chain |              |              |              |
| [Ni@Sn <sub>9</sub> ]-2D-sheet |              |              |              | Pb                             | 11.967200280 | 11.547000880 | 3.453567509  |
| Ni                             | 9.951292033  | 9.866183284  | 10.515999800 | Pb                             | 8.778599740  | 11.727000240 | 1.600406050  |
| Ni                             | 3.352900272  | 9.868690490  | 9.613599780  | Pb                             | 8.784999840  | 11.702199940 | 5.338890073  |
| Ni                             | 3.353032356  | 3.272145754  | 10.510400780 | Pb                             | 11.498999600 | 7.906399720  | 3.435574049  |
| Ni                             | 9.949576380  | 3.272673364  | 9.653800020  | Pb                             | 8.627399440  | 8.219599720  | 1.769287348  |
| Sn                             | 9.948653217  | 9.867502210  | 13.441200260 | Pb                             | 8.632400520  | 8.206800460  | 5.135438914  |
| Sn                             | 11.674981123 | 11.594358438 | 11.607600220 | Pb                             | 11.496800420 | 9.806400300  | 5.976019859  |
| Sn                             | 8.224964140  | 11.594885824 | 11.608400340 | Pb                             | 6.718999860  | 10.122400280 | 3.458809377  |
| Sn                             | 8.219553950  | 8.145396227  | 11.606999400 | Pb                             | 11.483600620 | 9.843199720  | 0.909720836  |
| Sn                             | 11.674057961 | 8.140250204  | 11.607799540 | Pb                             | 7.660799980  | 11.551400180 | 10.540209764 |
| Sn                             | 12.105671883 | 9.868426322  | 8.825200080  | Pb                             | 10.868999480 | 11.727399820 | 12.392520908 |
| Sn                             | 9.948256490  | 12.032966608 | 8.836200720  | Pb                             | 10.833599100 | 11.710599900 | 8.636185644  |
| Sn                             | 7.787411692  | 9.875551229  | 8.827799800  | Pb                             | 8.141400340  | 7.903199680  | 10.569820406 |
|                                |              |              |              | Pb                             | 11.022399900 | 8.228599540  | 12.213863376 |

|    |              |              |              |
|----|--------------|--------------|--------------|
| Pb | 10.98740006  | 8.209000580  | 8.851962096  |
| Pb | 8.123600000  | 9.804800040  | 8.019314764  |
| Pb | 12.912399300 | 10.135601040 | 10.504648208 |
| Pb | 8.166600220  | 9.850399980  | 13.083913809 |
| Ni | 9.765800480  | 10.121799460 | 3.457251078  |
| Ni | 9.866000180  | 10.139599800 | 10.532275202 |

[Ni@Pb<sub>9</sub>]-2D-sheet

|    |              |              |              |
|----|--------------|--------------|--------------|
| Pb | 3.556716676  | 12.807077409 | 11.237200740 |
| Pb | 1.776756764  | 12.308743479 | 8.400199900  |
| Pb | 5.334309102  | 12.299412728 | 8.400600440  |
| Pb | 3.541396137  | 8.230155938  | 11.239999780 |
| Pb | 1.770907047  | 8.738378521  | 8.398400300  |
| Pb | 5.326231009  | 8.732250207  | 8.400199900  |
| Pb | 5.838631149  | 10.507614132 | 11.233200080 |
| Pb | 3.555602544  | 10.521680830 | 6.442599780  |
| Pb | 1.260317563  | 10.526695248 | 11.233600620 |
| Pb | 10.507892602 | 12.799835200 | 8.602399820  |
| Pb | 12.279217716 | 12.296905519 | 11.451799400 |
| Pb | 8.722500803  | 12.296209329 | 11.437999720 |
| Pb | 10.520288464 | 8.234056474  | 8.600799560  |
| Pb | 12.286599161 | 8.739213946  | 11.451400760 |
| Pb | 8.731832502  | 8.731971737  | 11.432800300 |
| Pb | 8.221382142  | 10.511374471 | 8.605999940  |
| Pb | 10.494522094 | 10.517781255 | 13.399800300 |
| Pb | 12.809863088 | 10.519591327 | 8.619999880  |
| Pb | 10.49229335  | 1.264217263  | 11.203999520 |
| Pb | 12.27935600  | 1.765475397  | 8.371000280  |
| Pb | 8.721804613  | 1.775363924  | 8.365799900  |
| Pb | 10.514299386 | 5.840999122  | 11.205600740 |
| Pb | 12.288967134 | 5.325674054  | 8.369199760  |
| Pb | 8.730718606  | 5.338209151  | 8.370200160  |
| Pb | 8.217342371  | 3.561034208  | 11.207400320 |
| Pb | 10.511513707 | 3.553652527  | 6.414999960  |
| Pb | 12.788692469 | 3.541117666  | 11.210199360 |
| Pb | 3.548638819  | 1.270624047  | 8.623999600  |
| Pb | 1.759068613  | 1.767703648  | 11.459399220 |
| Pb | 5.322331434  | 1.775363924  | 11.463199620 |
| Pb | 3.540699961  | 5.843226914  | 8.633199700  |
| Pb | 1.752522469  | 5.327484613  | 11.465400700 |
| Pb | 5.314531796  | 5.330409054  | 11.472999580 |
| Pb | 5.828464025  | 3.561452150  | 8.622799880  |
| Pb | 3.534014706  | 3.547106744  | 13.420200340 |
| Pb | 1.256557112  | 3.550588363  | 8.618800160  |

|    |              |              |              |
|----|--------------|--------------|--------------|
| Ni | 3.548220877  | 10.515692713 | 9.536200520  |
| Ni | 10.506917956 | 10.516806609 | 10.302800180 |
| Ni | 10.504828452 | 3.550866847  | 9.508200640  |
| Ni | 3.540143020  | 3.553513528  | 10.324600220 |

The low-energy isomers of [TM@E<sub>9</sub>]<sup>n-</sup> clusters

[Co@Ge<sub>9</sub>]<sup>5-</sup>

|                       |              |              |              |
|-----------------------|--------------|--------------|--------------|
| $\Delta E = 0.000$ eV |              |              |              |
| Ge                    | -0.006282000 | 0.904221000  | 2.177489000  |
| Ge                    | 1.760606000  | -0.601934000 | -1.447870000 |
| Ge                    | 0.001343000  | 1.414992000  | -1.887449000 |
| Ge                    | 0.003933000  | -2.339038000 | -0.326998000 |
| Ge                    | 1.722177000  | -0.973980000 | 1.269006000  |
| Ge                    | -1.722348000 | -0.978054000 | 1.262031000  |
| Ge                    | -1.753690000 | -0.608218000 | -1.452305000 |
| Ge                    | 1.713071000  | 1.594471000  | 0.207514000  |
| Ge                    | -1.718615000 | 1.589945000  | 0.202226000  |
| Co                    | -0.000232000 | -0.002850000 | -0.004320000 |

$\Delta E = 0.715$  eV

|    |              |              |              |
|----|--------------|--------------|--------------|
| Co | 0.077300000  | -0.000320000 | 0.000657000  |
| Ge | -0.323731000 | 0.107527000  | -2.441715000 |
| Ge | -1.709613000 | -0.068239000 | 1.663431000  |
| Ge | 2.016015000  | 1.243793000  | 0.821314000  |
| Ge | 2.008156000  | -1.339459000 | 0.671148000  |
| Ge | -0.333818000 | -2.168741000 | 1.126715000  |
| Ge | -1.701741000 | 1.482618000  | -0.771635000 |
| Ge | -0.322752000 | 2.060990000  | 1.314442000  |
| Ge | 2.013298000  | 0.083032000  | -1.488197000 |
| Ge | -1.711036000 | -1.401250000 | -0.896058000 |

$\Delta E = 1.480$  eV

|    |              |              |              |
|----|--------------|--------------|--------------|
| Co | -0.002596000 | 0.037247000  | -0.118136000 |
| Ge | -1.381372000 | 0.937653000  | 1.568149000  |
| Ge | -1.334153000 | 2.048329000  | -0.711856000 |
| Ge | -0.017368000 | -1.901628000 | -1.445545000 |
| Ge | 1.464421000  | 0.900957000  | 1.524677000  |
| Ge | -2.159180000 | -0.371884000 | -1.130878000 |
| Ge | 2.155980000  | -0.437763000 | -1.104804000 |
| Ge | 1.364682000  | -1.616086000 | 1.111560000  |
| Ge | 1.365623000  | 1.990624000  | -0.779012000 |
| Ge | -1.456441000 | -1.581629000 | 1.067387000  |

|                               |              |              |              |                               |              |              |              |
|-------------------------------|--------------|--------------|--------------|-------------------------------|--------------|--------------|--------------|
| $\Delta E = 1.661 \text{ eV}$ |              |              |              | Ge                            | -0.327136000 | -2.179291000 | -1.248648000 |
| Co                            | -0.258683000 | 0.000169000  | -0.446882000 | Ge                            | -1.674696000 | 1.428056000  | 0.815382000  |
| Ge                            | 1.591153000  | 1.324368000  | -1.089643000 | Ge                            | -0.345552000 | 0.003359000  | 2.506376000  |
| Ge                            | 3.397067000  | -0.000910000 | 0.205055000  | Ge                            | 1.979416000  | 1.314332000  | -0.729737000 |
| Ge                            | -2.001415000 | -0.000696000 | 1.347170000  | Ge                            | -1.675605000 | -0.014549000 | -1.638573000 |
| Ge                            | 1.591963000  | -1.322150000 | -1.090654000 | $\Delta E = 1.434 \text{ eV}$ |              |              |              |
| Ge                            | -2.260744000 | -1.276747000 | -0.991473000 | Ni                            | -0.001509000 | 0.080916000  | -0.095033000 |
| Ge                            | 1.128002000  | -0.000256000 | 1.448857000  | Ge                            | -1.524462000 | 0.777933000  | 1.556674000  |
| Ge                            | -0.484201000 | 2.068522000  | 0.770339000  | Ge                            | -1.406240000 | 2.081883000  | -0.630643000 |
| Ge                            | -0.483379000 | -2.068849000 | 0.768969000  | Ge                            | 0.015420000  | -1.830188000 | -1.530710000 |
| Ge                            | -2.260182000 | 1.276575000  | -0.991562000 | Ge                            | 1.513126000  | 0.799018000  | 1.555554000  |
| $\Delta E = 1.690 \text{ eV}$ |              |              |              | Ge                            | -2.152006000 | -0.335406000 | -1.087400000 |
| Co                            | -0.243976000 | -0.001827000 | -0.336813000 | Ge                            | 2.144381000  | -0.266948000 | -1.113923000 |
| Ge                            | -1.174830000 | 2.101013000  | -0.949620000 | Ge                            | 1.436141000  | -1.702549000 | 0.948987000  |
| Ge                            | -1.170515000 | 1.410984000  | 1.466938000  | Ge                            | 1.344523000  | 2.131071000  | -0.601144000 |
| Ge                            | 1.559374000  | 1.336387000  | -1.015102000 | Ge                            | -1.369562000 | -1.725616000 | 0.985759000  |
| Ge                            | -2.631344000 | -0.032550000 | -0.638640000 | $\Delta E = 1.451 \text{ eV}$ |              |              |              |
| Ge                            | -1.125785000 | -2.141681000 | -0.900611000 | Ni                            | -0.318591000 | -0.000738000 | -0.598371000 |
| Ge                            | -1.203004000 | -1.365654000 | 1.494587000  | Ge                            | 1.654727000  | 1.304538000  | -1.112109000 |
| Ge                            | 3.301820000  | -0.038652000 | 0.386320000  | Ge                            | 3.344938000  | -0.000914000 | 0.374343000  |
| Ge                            | 1.086716000  | -0.013666000 | 1.563476000  | Ge                            | -1.756708000 | -0.000059000 | 1.487423000  |
| Ge                            | 1.563423000  | -1.254639000 | -1.123162000 | Ge                            | 1.654554000  | -1.303213000 | -1.114903000 |
| $[\text{Ni}@Ge_9]^{4-}$       |              |              |              | Ge                            | -2.395049000 | -1.275474000 | -0.834735000 |
| $\Delta E = 0.000 \text{ eV}$ |              |              |              | Ge                            | 1.019245000  | 0.000182000  | 1.360350000  |
| Ni                            | 0.001205000  | -0.000256000 | 0.005679000  | Ge                            | -0.425051000 | 2.161193000  | 0.600169000  |
| Ge                            | 1.727194000  | 1.409615000  | -0.748408000 | Ge                            | -0.424464000 | -2.161393000 | 0.599858000  |
| Ge                            | -1.736324000 | -1.342205000 | -0.841989000 | Ge                            | -2.393423000 | 1.275787000  | -0.836822000 |
| Ge                            | -0.005744000 | 0.088723000  | -2.383830000 | $\Delta E = 1.565 \text{ eV}$ |              |              |              |
| Ge                            | 1.708492000  | -1.373097000 | -0.852423000 | Ni                            | -0.388025000 | -0.275585000 | 0.337827000  |
| Ge                            | -1.712636000 | 1.429092000  | -0.739884000 | Ge                            | 1.424104000  | 0.775510000  | 1.380231000  |
| Ge                            | -0.012720000 | -2.107766000 | 1.127632000  | Ge                            | -0.735422000 | -2.239619000 | -0.834155000 |
| Ge                            | -1.747822000 | -0.050847000 | 1.581277000  | Ge                            | -1.772821000 | 0.018313000  | -1.647033000 |
| Ge                            | 1.760934000  | -0.069475000 | 1.568348000  | Ge                            | 0.082271000  | 1.695165000  | -1.097753000 |
| Ge                            | 0.017571000  | 2.016184000  | 1.284307000  | Ge                            | 1.696580000  | -1.301636000 | -0.674857000 |
| $\Delta E = 0.687 \text{ eV}$ |              |              |              | Ge                            | -2.734446000 | 0.056809000  | 0.729732000  |
| Ni                            | 0.092721000  | 0.000218000  | 0.000531000  | Ge                            | 0.885172000  | -1.829348000 | 1.636412000  |
| Ge                            | -0.348049000 | 2.167473000  | -1.264486000 | Ge                            | 2.486192000  | 1.170880000  | -0.975166000 |
| Ge                            | -1.667494000 | -1.428076000 | 0.823645000  | Ge                            | -0.992110000 | 1.895063000  | 1.186990000  |
| Ge                            | 1.985549000  | -0.013434000 | 1.501118000  | $[\text{Cu}@Ge_9]^{3-}$       |              |              |              |
| Ge                            | 1.992435000  | -1.278061000 | -0.765541000 | $\Delta E = 0.000 \text{ eV}$ |              |              |              |

|                               |              |              |              |                               |              |              |              |
|-------------------------------|--------------|--------------|--------------|-------------------------------|--------------|--------------|--------------|
| Cu                            | 0.000047000  | -0.000166000 | -0.039367000 | Ge                            | 2.167805000  | 1.872204000  | 0.909575000  |
| Ge                            | -1.709011000 | 1.427068000  | 0.802719000  | Ge                            | 0.665297000  | -1.263923000 | -1.632879000 |
| Ge                            | 0.001873000  | 2.078558000  | -1.261920000 |                               |              |              |              |
| Ge                            | 1.708082000  | -1.425895000 | 0.807023000  | $\Delta E = 1.262 \text{ eV}$ |              |              |              |
| Ge                            | -1.711049000 | -1.422649000 | 0.806407000  | Cu                            | -0.062400000 | 1.235542000  | 0.003925000  |
| Ge                            | -0.001443000 | -2.081322000 | -1.257567000 | Ge                            | 1.322965000  | -0.437527000 | 1.367588000  |
| Ge                            | -1.853148000 | -0.000769000 | -1.540168000 | Ge                            | -0.276508000 | -1.964382000 | -0.003187000 |
| Ge                            | 1.710172000  | 1.425451000  | 0.803230000  | Ge                            | 1.321173000  | -0.432553000 | -1.366807000 |
| Ge                            | -0.000374000 | 0.002884000  | 2.414172000  | Ge                            | 2.286699000  | 1.658168000  | 0.002455000  |
| Ge                            | 1.854857000  | -0.003175000 | -1.538219000 | Ge                            | -1.414909000 | 0.138966000  | -1.875199000 |
|                               |              |              |              | Ge                            | -2.512290000 | 1.516427000  | 0.003084000  |
| $\Delta E = 0.115 \text{ eV}$ |              |              |              | Ge                            | -2.720747000 | -1.141822000 | -0.003612000 |
| Cu                            | 0.694592000  | 0.000008000  | 1.618447000  | Ge                            | -1.415701000 | 0.129291000  | 1.875134000  |
| Ge                            | 1.104882000  | -2.025191000 | 0.183093000  | Ge                            | 3.465869000  | -0.586277000 | -0.003013000 |
| Ge                            | -0.836769000 | 1.447643000  | -1.413561000 |                               |              |              |              |
| Ge                            | -0.836858000 | -1.448643000 | -1.413179000 | $[\text{Co@Sn}_9]^{5-}$       |              |              |              |
| Ge                            | -1.277362000 | 1.396192000  | 1.330840000  | $\Delta E = 0.000 \text{ eV}$ |              |              |              |
| Ge                            | -2.711982000 | -0.000341000 | -0.311429000 | Sn                            | 1.940048000  | -1.741666000 | -0.136704000 |
| Ge                            | 1.329667000  | 0.000419000  | -1.755362000 | Sn                            | -1.882162000 | 0.990593000  | -1.480351000 |
| Ge                            | -1.276360000 | -1.395463000 | 1.332198000  | Sn                            | -0.009343000 | -1.195386000 | -2.360480000 |
| Ge                            | 2.770525000  | -0.000080000 | 0.397263000  | Sn                            | 1.852017000  | 1.009510000  | -1.503290000 |
| Ge                            | 1.104785000  | 2.025458000  | 0.183421000  | Sn                            | -1.857340000 | 0.776163000  | 1.629094000  |
|                               |              |              |              | Sn                            | 1.871383000  | 0.793592000  | 1.607952000  |
| $\Delta E = 0.443 \text{ eV}$ |              |              |              | Sn                            | -0.011112000 | 2.644282000  | 0.182764000  |
| Cu                            | -0.118900000 | 0.001099000  | -0.036396000 | Sn                            | 0.022141000  | -1.516902000 | 2.170532000  |
| Ge                            | -2.019622000 | 1.299330000  | -0.766239000 | Sn                            | -1.926256000 | -1.755755000 | -0.109892000 |
| Ge                            | 0.353729000  | -2.217063000 | -1.263181000 | Co                            | 0.001154000  | -0.008207000 | 0.000692000  |
| Ge                            | 1.648659000  | 1.455489000  | 0.805938000  |                               |              |              |              |
| Ge                            | -1.986748000 | 0.014906000  | 1.515713000  | $\Delta E = 0.008 \text{ eV}$ |              |              |              |
| Ge                            | 1.652061000  | -1.432424000 | 0.838871000  | Co                            | -0.000215000 | -0.001156000 | -0.036224000 |
| Ge                            | 0.357056000  | 2.183478000  | -1.319816000 | Sn                            | 2.159197000  | 0.296478000  | -1.506076000 |
| Ge                            | 0.372720000  | 0.030124000  | 2.551519000  | Sn                            | 0.363668000  | -2.128802000 | -1.530929000 |
| Ge                            | -2.019680000 | -1.313129000 | -0.739826000 | Sn                            | -2.062446000 | -0.332510000 | -1.625983000 |
| Ge                            | 1.749578000  | -0.02107000  | -1.589994000 | Sn                            | 1.901902000  | -1.415244000 | 0.979258000  |
|                               |              |              |              | Sn                            | -0.267495000 | 2.094366000  | -1.597768000 |
| $\Delta E = 1.183 \text{ eV}$ |              |              |              | Sn                            | -1.461275000 | -1.915869000 | 0.879219000  |
| Cu                            | 0.279096000  | 0.205001000  | 0.734405000  | Sn                            | 1.404196000  | 1.934083000  | 0.923447000  |
| Ge                            | -1.108725000 | 0.691375000  | -1.343466000 | Sn                            | -1.955877000 | 1.438162000  | 0.832709000  |
| Ge                            | 2.590388000  | -0.531823000 | 0.549859000  | Sn                            | -0.081755000 | 0.029962000  | 2.665685000  |
| Ge                            | -1.639332000 | -1.347314000 | 0.628690000  |                               |              |              |              |
| Ge                            | 1.437214000  | 1.330752000  | -1.435991000 | $\Delta E = 1.364 \text{ eV}$ |              |              |              |
| Ge                            | -1.835556000 | 1.093057000  | 1.472556000  | Co                            | 0.098177000  | 0.000585000  | 0.001212000  |
| Ge                            | -3.368090000 | 0.365869000  | -0.393801000 | Sn                            | -0.358160000 | -0.945420000 | 2.607079000  |
| Ge                            | 0.838067000  | -2.395979000 | 0.579902000  | Sn                            | -1.917748000 | 0.624460000  | -1.719143000 |

|                                |              |              |              |                               |              |              |              |
|--------------------------------|--------------|--------------|--------------|-------------------------------|--------------|--------------|--------------|
| Sn                             | 2.256028000  | -1.076610000 | -1.293959000 |                               |              |              |              |
| Sn                             | 2.256096000  | 1.661708000  | -0.286503000 | $\Delta E = 1.459 \text{ eV}$ |              |              |              |
| Sn                             | -0.359765000 | 2.731658000  | -0.484980000 | Ni                            | 0.114276000  | -0.001265000 | 0.000976000  |
| Sn                             | -1.910218000 | -1.809295000 | 0.319395000  | Sn                            | -0.383940000 | -2.393687000 | -1.578483000 |
| Sn                             | -0.359036000 | -1.784481000 | -2.123353000 | Sn                            | -1.838669000 | 1.519976000  | 1.007307000  |
| Sn                             | 2.256911000  | -0.582047000 | 1.578868000  | Sn                            | 2.198887000  | 1.528766000  | -0.723621000 |
| Sn                             | -1.917125000 | 1.179711000  | 1.401943000  | Sn                            | 2.208567000  | -0.142759000 | 1.675132000  |
| $\Delta E = 1.619 \text{ eV}$  |              |              |              | Sn                            | -0.368619000 | -0.173583000 | 2.862344000  |
| Co                             | 0.291487000  | -0.000056000 | -0.066580000 | Sn                            | -1.848877000 | 0.107727000  | -1.810402000 |
| Sn                             | -1.395849000 | 0.000190000  | 1.809025000  | Sn                            | -0.382840000 | 2.566078000  | -1.281746000 |
| Sn                             | 1.667444000  | 1.533514000  | -1.578420000 | Sn                            | 2.198604000  | -1.388152000 | -0.969999000 |
| Sn                             | 1.666400000  | -1.535054000 | -1.577765000 | Sn                            | -1.847108000 | -1.623659000 | 0.818922000  |
| Sn                             | -1.327793000 | -1.683613000 | -0.991431000 | $\Delta E = 1.593 \text{ eV}$ |              |              |              |
| Sn                             | -1.327052000 | 1.684511000  | -0.991024000 | Sn                            | 2.688007000  | -0.000904000 | -0.947230000 |
| Sn                             | 2.673969000  | -0.000277000 | 1.015218000  | Sn                            | -1.270869000 | -1.850902000 | 0.920383000  |
| Sn                             | 0.741431000  | 2.233735000  | 1.256439000  | Sn                            | -1.270742000 | 1.852002000  | 0.919404000  |
| Sn                             | -3.596502000 | 0.000141000  | -0.163439000 | Sn                            | -1.462700000 | -0.001318000 | -1.838778000 |
| Sn                             | 0.740548000  | -2.233117000 | 1.257351000  | Sn                            | 0.704685000  | -2.217281000 | -1.316773000 |
| $\Delta E = 1.887 \text{ eV}$  |              |              |              | Sn                            | 1.604567000  | 1.529936000  | 1.620607000  |
| Co                             | -0.270938000 | -0.006908000 | -0.277559000 | Sn                            | -3.454871000 | 0.000268000  | 0.333513000  |
| Sn                             | -1.261793000 | 2.329974000  | -1.153090000 | Sn                            | 0.705318000  | 2.216065000  | -1.319232000 |
| Sn                             | -1.328400000 | 1.560155000  | 1.624195000  | Sn                            | 1.605178000  | -1.528121000 | 1.621698000  |
| Sn                             | 1.625853000  | 1.541837000  | -1.008336000 | Ni                            | 0.270402000  | 0.000457000  | 0.011442000  |
| Sn                             | -2.943330000 | -0.001337000 | -0.642624000 | $\Delta E = 1.804 \text{ eV}$ |              |              |              |
| Sn                             | -1.250885000 | -2.336800000 | -1.141093000 | Sn                            | -2.531102000 | 1.443529000  | 1.064202000  |
| Sn                             | -1.416852000 | -1.531730000 | 1.631679000  | Sn                            | -2.063175000 | 0.001921000  | -1.619411000 |
| Sn                             | 3.796157000  | -0.033861000 | 0.241318000  | Sn                            | 1.654994000  | -1.471895000 | 1.284007000  |
| Sn                             | 1.292490000  | -0.075076000 | 1.755693000  | Sn                            | 3.771700000  | -0.001959000 | -0.258365000 |
| Sn                             | 1.633067000  | -1.449430000 | -1.157860000 | Sn                            | -0.452527000 | 2.438325000  | -0.766571000 |
| $[\text{Ni}@\text{Sn}_9]^{4-}$ |              |              |              | Sn                            | 1.165271000  | -0.001227000 | -1.561522000 |
| $\Delta E = 0.000 \text{ eV}$  |              |              |              | Sn                            | -0.456042000 | -2.437844000 | -0.766316000 |
| Sn                             | -2.088377000 | -0.353717000 | 1.616882000  | Sn                            | -2.536199000 | -1.441693000 | 1.061778000  |
| Sn                             | -2.019163000 | 1.263728000  | -0.962402000 | Sn                            | 1.655936000  | 1.471872000  | 1.281817000  |
| Sn                             | 0.443629000  | -2.050525000 | 1.651455000  | Ni                            | -0.372957000 | -0.001838000 | 0.500681000  |
| Sn                             | -0.433774000 | 2.197885000  | 1.460161000  | $\Delta E = 1.902 \text{ eV}$ |              |              |              |
| Sn                             | 2.014242000  | -1.347764000 | -0.849743000 | Ni                            | -0.308492000 | -0.007895000 | -0.301506000 |
| Sn                             | -1.343334000 | -2.032823000 | -0.806505000 | Sn                            | -1.313734000 | 2.374923000  | -1.159643000 |
| Sn                             | 2.097927000  | 0.503529000  | 1.565027000  | Sn                            | -1.222327000 | 1.614553000  | 1.624984000  |
| Sn                             | -0.008280000 | -0.129491000 | -2.696910000 | Sn                            | 1.563969000  | 1.628851000  | -0.911790000 |
| Sn                             | 1.336625000  | 1.947114000  | -1.005014000 | Sn                            | -2.913825000 | -0.034125000 | -0.596286000 |
| Ni                             | 0.000902000  | 0.003685000  | 0.048303000  | Sn                            | -1.241770000 | -2.422823000 | -1.108454000 |

|    |              |              |              |
|----|--------------|--------------|--------------|
| Sn | -1.349823000 | -1.571572000 | 1.653975000  |
| Sn | 3.737746000  | -0.089556000 | 0.178721000  |
| Sn | 1.317720000  | -0.128517000 | 1.767868000  |
| Sn | 1.594800000  | -1.367312000 | -1.280532000 |

[Cu@Sn<sub>9</sub>]<sup>3-</sup>

ΔE = 0.000 eV

|    |              |              |              |
|----|--------------|--------------|--------------|
| Sn | 1.912754000  | 1.512222000  | 0.989037000  |
| Sn | -0.003805000 | -2.244669000 | -1.523165000 |
| Sn | 0.001005000  | -0.146341000 | 2.709799000  |
| Sn | 1.967103000  | 0.101350000  | -1.770460000 |
| Sn | 1.886518000  | -1.634128000 | 0.813342000  |
| Sn | -1.892428000 | -1.628190000 | 0.813976000  |
| Sn | -1.966580000 | 0.107169000  | -1.770692000 |
| Sn | 0.003905000  | 2.411387000  | -1.242823000 |
| Sn | -1.908419000 | 1.516832000  | 0.989811000  |
| Cu | -0.000091000 | 0.005167000  | -0.015215000 |

ΔE = 0.918 eV

|    |              |              |              |
|----|--------------|--------------|--------------|
| Sn | 0.789179000  | 1.599131000  | -1.552080000 |
| Sn | -1.376401000 | -2.389740000 | 0.394381000  |
| Sn | -1.828437000 | -0.003880000 | -1.773969000 |
| Sn | -2.993057000 | 0.001858000  | 1.040369000  |
| Sn | 0.789454000  | -1.601923000 | -1.550377000 |
| Sn | -1.377889000 | 2.390591000  | 0.389136000  |
| Sn | 1.529940000  | 1.543437000  | 1.574246000  |
| Sn | 1.529733000  | -1.541272000 | 1.575439000  |
| Sn | 3.127406000  | 0.000810000  | -0.420331000 |
| Cu | -0.327463000 | 0.00706000   | 0.557220000  |

ΔE = 1.230 eV

|    |              |              |              |
|----|--------------|--------------|--------------|
| Cu | 0.134421000  | -0.002025000 | -0.000288000 |
| Sn | -0.396706000 | -0.374034000 | -2.883523000 |
| Sn | -1.851665000 | 0.231235000  | 1.813836000  |
| Sn | 2.219076000  | 1.569051000  | 0.669441000  |
| Sn | 2.228286000  | -1.359858000 | 1.017972000  |
| Sn | -0.388180000 | -2.313985000 | 1.764047000  |
| Sn | -1.854435000 | 1.449591000  | -1.108544000 |
| Sn | -0.400126000 | 2.684513000  | 1.120408000  |
| Sn | 2.222123000  | -0.197990000 | -1.693011000 |
| Sn | -1.856337000 | -1.687349000 | -0.700458000 |

ΔE = 1.333 eV

|    |              |              |              |
|----|--------------|--------------|--------------|
| Sn | -1.824170000 | -1.480005000 | -1.270052000 |
|----|--------------|--------------|--------------|

|    |              |              |              |
|----|--------------|--------------|--------------|
| Sn | 0.453311000  | -2.474428000 | 0.599396000  |
| Sn | 1.931425000  | -0.000363000 | 1.736816000  |
| Sn | 2.735408000  | 1.445634000  | -0.917686000 |
| Sn | -3.792044000 | 0.000484000  | 0.435528000  |
| Sn | 0.454188000  | 2.474385000  | 0.598926000  |
| Sn | -1.119567000 | 0.000387000  | 1.477816000  |
| Sn | -1.823502000 | 1.480074000  | -1.270269000 |
| Sn | 2.734509000  | -1.446117000 | -0.918349000 |
| Cu | 0.431799000  | -0.000091000 | -0.814009000 |

ΔE = 1.684 eV

|    |              |              |              |
|----|--------------|--------------|--------------|
| Cu | -0.358258000 | 0.000152000  | -0.460844000 |
| Sn | -1.310617000 | 2.478080000  | -1.097502000 |
| Sn | -1.244537000 | 1.602771000  | 1.662737000  |
| Sn | 1.601627000  | 1.532516000  | -1.131336000 |
| Sn | -2.952296000 | -0.000025000 | -0.578621000 |
| Sn | -1.310990000 | -2.478264000 | -1.097289000 |
| Sn | -1.242869000 | -1.602815000 | 1.662722000  |
| Sn | 3.718315000  | 0.000274000  | 0.173421000  |
| Sn | 1.348137000  | 0.001433000  | 1.801902000  |
| Sn | 1.601020000  | -1.534059000 | -1.128745000 |

[Co@Pb<sub>9</sub>]<sup>5-</sup>

ΔE = 0.000 eV

|    |              |              |              |
|----|--------------|--------------|--------------|
| Pb | -2.056309000 | 1.902542000  | -0.104922000 |
| Pb | 0.389633000  | 1.912682000  | 1.795924000  |
| Pb | 0.633576000  | 1.981207000  | -1.643838000 |
| Pb | -2.019827000 | -0.703388000 | 1.570174000  |
| Pb | 2.706708000  | 0.464096000  | 0.203853000  |
| Pb | -1.770448000 | -0.625435000 | -1.870330000 |
| Pb | 1.341240000  | -1.043281000 | -2.179937000 |
| Pb | -0.248650000 | -2.742476000 | -0.076142000 |
| Pb | 1.015118000  | -1.137669000 | 2.304404000  |
| Co | 0.027210000  | -0.025141000 | 0.002474000  |

ΔE = 0.013 eV

|    |              |              |              |
|----|--------------|--------------|--------------|
| Pb | 1.597987000  | 0.125930000  | 2.247880000  |
| Pb | -0.858577000 | -1.838802000 | -1.704602000 |
| Pb | -1.029320000 | 1.779876000  | 1.672898000  |
| Pb | 1.674583000  | -0.018784000 | -2.195095000 |
| Pb | -0.917426000 | -1.728852000 | 1.788397000  |
| Pb | 1.573119000  | 2.265708000  | -0.046919000 |
| Pb | 1.716809000  | -2.159204000 | 0.099954000  |
| Pb | -2.801592000 | -0.089977000 | -0.043791000 |



|                                |              |              |              |                               |              |              |              |
|--------------------------------|--------------|--------------|--------------|-------------------------------|--------------|--------------|--------------|
| Pb                             | -0.968904000 | 1.663682000  | -1.818995000 | Pb                            | 1.972205000  | 1.445385000  | 1.049392000  |
| Co                             | 0.040455000  | 0.001282000  | 0.000825000  | Pb                            | -0.271716000 | -2.122764000 | -1.778134000 |
| $\Delta E = 1.507 \text{ eV}$  |              |              |              | Pb                            | 2.203416000  | -0.143956000 | -1.680005000 |
| Pb                             | -2.041808000 | -1.846262000 | 0.009305000  | Pb                            | 1.552880000  | -2.006635000 | 0.802601000  |
| Pb                             | -0.211363000 | 2.791543000  | -0.120232000 | Pb                            | -2.205377000 | 0.383948000  | -1.639804000 |
| Pb                             | -1.904223000 | 0.872470000  | 1.627246000  | Pb                            | -1.552334000 | 1.868209000  | 1.080993000  |
| Pb                             | 1.651184000  | 1.146977000  | 1.729647000  | Ni                            | 0.000351000  | 0.003929000  | -0.057102000 |
| Pb                             | -1.799534000 | 0.732634000  | -1.805434000 | $\Delta E = 0.005 \text{ eV}$ |              |              |              |
| Pb                             | 0.049377000  | -1.501794000 | 2.319496000  | Pb                            | 0.045700000  | -1.616900000 | 2.263923000  |
| Pb                             | 0.193504000  | -1.681639000 | -2.185950000 | Pb                            | -1.748802000 | 0.938038000  | 1.770986000  |
| Pb                             | 2.299149000  | -1.509199000 | 0.132922000  | Pb                            | -0.053263000 | -1.591772000 | -2.281936000 |
| Pb                             | 1.762746000  | 1.007344000  | -1.707465000 | Pb                            | 1.833457000  | 0.929300000  | 1.688889000  |
| Co                             | 0.002941000  | -0.036677000 | 0.001410000  | Pb                            | 1.748543000  | 0.949979000  | -1.761042000 |
| $\Delta E = 1.697 \text{ eV}$  |              |              |              | Pb                            | 0.005282000  | 2.821381000  | 0.020187000  |
| Pb                             | 1.819884000  | 1.740904000  | -1.129530000 | Pb                            | 2.195100000  | -1.689671000 | -0.056695000 |
| Pb                             | -2.786965000 | 0.297163000  | 0.057501000  | Pb                            | -1.821280000 | 0.957854000  | -1.685008000 |
| Pb                             | 1.452491000  | -2.090506000 | 1.066760000  | Pb                            | -2.204583000 | -1.679795000 | 0.040676000  |
| Pb                             | 1.475044000  | -1.265601000 | -1.961074000 | Ni                            | -0.000447000 | -0.053925000 | 0.000061000  |
| Pb                             | -0.917241000 | 0.753710000  | -2.368086000 | $\Delta E = 1.156 \text{ eV}$ |              |              |              |
| Pb                             | -0.960720000 | -0.555222000 | 2.407457000  | Pb                            | 1.859229000  | -1.029742000 | 1.617162000  |
| Pb                             | -1.206841000 | -2.275550000 | -0.631224000 | Pb                            | 1.876071000  | -0.827159000 | -1.714690000 |
| Pb                             | -0.671845000 | 2.477401000  | 0.661595000  | Pb                            | -0.017070000 | 1.366139000  | 2.432840000  |
| Pb                             | 1.783387000  | 0.919251000  | 1.896712000  | Pb                            | 0.016350000  | -2.806163000 | -0.172304000 |
| Co                             | 0.038897000  | -0.004711000 | -0.000334000 | Pb                            | -2.108296000 | 1.754036000  | 0.099104000  |
| $\Delta E = 2.216 \text{ eV}$  |              |              |              | Pb                            | -1.854421000 | -0.846176000 | -1.728532000 |
| Pb                             | -1.928092000 | -1.116883000 | -1.494987000 | Pb                            | -1.860773000 | -1.050712000 | 1.601653000  |
| Pb                             | 0.001962000  | 1.101796000  | -2.546383000 | Pb                            | -0.000446000 | 1.651910000  | -2.249208000 |
| Pb                             | 1.928553000  | -1.118814000 | -1.493017000 | Pb                            | 2.089530000  | 1.775521000  | 0.113603000  |
| Pb                             | -0.001591000 | -2.757442000 | 0.335261000  | Ni                            | -0.000512000 | 0.036155000  | 0.001090000  |
| Pb                             | -1.932320000 | -0.729665000 | 1.711858000  | $\Delta E = 1.704 \text{ eV}$ |              |              |              |
| Pb                             | -1.948725000 | 1.840416000  | -0.221321000 | Pb                            | -0.883886000 | -1.642169000 | 1.578655000  |
| Pb                             | -0.000369000 | 1.672706000  | 2.213893000  | Pb                            | -1.467899000 | -1.567846000 | -1.661065000 |
| Pb                             | 1.929757000  | -0.731604000 | 1.713888000  | Pb                            | 1.933009000  | 0.001274000  | 1.832369000  |
| Pb                             | 1.950822000  | 1.838529000  | -0.219183000 | Pb                            | -3.309843000 | -0.001276000 | 0.312059000  |
| Co                             | 0.000010000  | 0.002925000  | -0.000030000 | Pb                            | 1.454550000  | 2.430426000  | -0.371823000 |
| $[\text{Ni}@\text{Pb}_9]^{4-}$ |              |              |              | Pb                            | -1.470132000 | 1.566536000  | -1.659577000 |
| $\Delta E = 0.000 \text{ eV}$  |              |              |              | Pb                            | -0.885085000 | 1.641805000  | 1.579220000  |
| Pb                             | 0.001915000  | -0.200997000 | 2.810458000  | Pb                            | 3.076187000  | 0.001356000  | -1.132669000 |
| Pb                             | 0.272127000  | 2.352972000  | -1.459144000 | Pb                            | 1.457927000  | -2.430018000 | -0.369710000 |
| Pb                             | -1.973236000 | -1.577502000 | 0.833140000  | Ni                            | 0.278717000  | -0.000258000 | -0.314705000 |

|                               |              |              |              |                               |              |              |              |
|-------------------------------|--------------|--------------|--------------|-------------------------------|--------------|--------------|--------------|
| $\Delta E = 2.279 \text{ eV}$ |              |              |              | Pb                            | -0.000027000 | -2.721237000 | 0.758929000  |
| Pb                            | 1.469143000  | 1.566901000  | -1.659989000 | Pb                            | -1.989436000 | -1.340792000 | -1.313632000 |
| Pb                            | 0.885322000  | -1.641879000 | 1.578275000  | Pb                            | -1.990501000 | 1.807293000  | -0.503438000 |
| Pb                            | 1.467752000  | -1.567194000 | -1.660443000 | Cu                            | -0.000017000 | -0.000469000 | -0.000343000 |
| Pb                            | 0.884673000  | 1.641432000  | 1.579118000  | $\Delta E = 1.385 \text{ eV}$ |              |              |              |
| Pb                            | 3.310456000  | -0.000026000 | 0.311273000  | Pb                            | 1.915743000  | 0.000286000  | -1.829000000 |
| Pb                            | -1.456037000 | 2.430252000  | -0.371593000 | Pb                            | -3.283950000 | -0.000398000 | -0.368042000 |
| Pb                            | -3.077049000 | 0.000403000  | -1.131491000 | Pb                            | -0.855965000 | -1.658561000 | -1.596881000 |
| Pb                            | -1.932099000 | 0.000230000  | 1.833154000  | Pb                            | 1.468445000  | 2.467437000  | 0.381402000  |
| Pb                            | -1.456696000 | -2.430183000 | -0.370858000 | Pb                            | -0.856110000 | 1.659214000  | -1.595947000 |
| Ni                            | -0.279575000 | 0.000189000  | -0.314658000 | Pb                            | -1.549728000 | 1.615881000  | 1.654420000  |
| $[\text{Cu}@Pb_9]^{3-}$       |              |              |              | Pb                            | 1.468501000  | -2.467580000 | 0.381669000  |
| $\Delta E = 0.000 \text{ eV}$ |              |              |              | Pb                            | -1.550743000 | -1.615600000 | 1.653901000  |
| Pb                            | 2.285358000  | 0.146088000  | -1.642908000 | Pb                            | 3.124618000  | -0.000605000 | 1.121344000  |
| Pb                            | -0.015926000 | -0.009410000 | 2.838883000  | Cu                            | 0.337015000  | -0.000209000 | 0.557417000  |
| Pb                            | 1.662401000  | 1.883949000  | 0.967675000  | $\Delta E = 2.238 \text{ eV}$ |              |              |              |
| Pb                            | -0.131833000 | 2.282559000  | -1.648134000 | Pb                            | -1.551459000 | 1.615306000  | -1.655026000 |
| Pb                            | -2.269584000 | -0.135589000 | -1.666051000 | Pb                            | 1.914624000  | 0.001618000  | 1.828710000  |
| Pb                            | 0.149942000  | -2.272542000 | -1.660160000 | Pb                            | 1.468738000  | 2.467135000  | -0.381111000 |
| Pb                            | 1.884897000  | -1.668376000 | 0.957340000  | Pb                            | 3.124854000  | 0.000353000  | -1.121312000 |
| Pb                            | -1.672682000 | -1.892586000 | 0.937985000  | Pb                            | -0.857339000 | 1.659019000  | 1.596256000  |
| Pb                            | -1.892444000 | 1.666063000  | 0.947960000  | Pb                            | -1.550086000 | -1.616523000 | -1.654128000 |
| Cu                            | -0.000364000 | -0.000441000 | -0.092149000 | Pb                            | 1.470614000  | -2.467123000 | -0.380320000 |
| $\Delta E = 0.020 \text{ eV}$ |              |              |              | Pb                            | -0.856072000 | -1.658635000 | 1.597170000  |
| Pb                            | -0.177973000 | -2.296496000 | 1.630111000  | Pb                            | -3.283083000 | -0.000984000 | 0.367786000  |
| Pb                            | 2.281442000  | -0.203718000 | 1.639504000  | Cu                            | 0.337074000  | -0.000465000 | -0.559931000 |
| Pb                            | -0.040859000 | 0.013066000  | -2.838619000 |                               |              |              |              |
| Pb                            | -1.640527000 | 1.928889000  | -0.920071000 |                               |              |              |              |
| Pb                            | 1.929660000  | 1.607675000  | -0.969037000 |                               |              |              |              |
| Pb                            | 1.624090000  | -1.908086000 | -0.981885000 |                               |              |              |              |
| Pb                            | -2.243565000 | 0.185353000  | 1.694762000  |                               |              |              |              |
| Pb                            | -1.951950000 | -1.604408000 | -0.936538000 |                               |              |              |              |
| Pb                            | 0.220228000  | 2.278312000  | 1.649052000  |                               |              |              |              |
| Cu                            | -0.001545000 | -0.001661000 | 0.092521000  |                               |              |              |              |
| $\Delta E = 0.827 \text{ eV}$ |              |              |              |                               |              |              |              |
| Pb                            | 1.989536000  | -1.340791000 | -1.313489000 |                               |              |              |              |
| Pb                            | -1.991876000 | -0.467245000 | 1.816703000  |                               |              |              |              |
| Pb                            | 1.991767000  | -0.467254000 | 1.816786000  |                               |              |              |              |
| Pb                            | 1.990505000  | 1.807324000  | -0.503312000 |                               |              |              |              |
| Pb                            | -0.000053000 | 2.017685000  | 1.977053000  |                               |              |              |              |
| Pb                            | 0.000090000  | 0.705184000  | -2.735479000 |                               |              |              |              |
